# Supplementary material for: Functional characterisation of twelve terpene synthases from actinobacteria
Source: publisher site journal article supplement (doi:10.3762/bjoc.19.100), 2023-09-15
Supplement: Additional file 1 [file 1860-5397-19-100-S1.pdf]

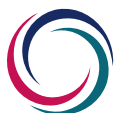

## Supporting Information

for

### Functional characterisation of twelve terpene synthases from actinobacteria

Anuj K. Chhalodia, Houchao Xu, Georges B. Tabekoueng, Binbin Gu, Kizerbo A. Taizoumbe, Lukas Lauterbach and Jeroen S. Dickschat

*Beilstein J. Org. Chem.* **2023**, *19*, 1386–1398. [doi:10.3762/bjoc.19.100](https://doi.org/10.3762/bjoc.19.100)

### Additional information and spectra

## Construction of phylogenetic tree

The amino acid sequences of 4018 bacterial terpene synthase homologs were obtained through a BLAST search in genome sequenced bacteria and used to construct the phylogenetic tree (Figure 2 of main text). All of the included sequences were individually inspected for the presence of the highly conserved motifs required for type I terpene synthase activity (i.e., the aspartate-rich motif, the NSE triad, the pyrophosphate sensor and the RY pair). The tree was constructed through the tree builder function of Geneious (alignment type: global alignment with free end gaps, cost matrix: Blosum45, genetic distance model: Jukes-Cantor, tree build method: neighbor-joining, gap open penalty: 8, gap extension penalty: 2).

## Strains and culture collections

*Kutzneria kofuensis* DSM 43851, *Streptomyces jumonjinensis* NRRL 5741 (= DSM 747), *Streptomyces lavendulae* NRRL B-2774 (= DSM 40069), *Streptomyces subutilus* ATCC 27467 (= DSM 40445), *Streptomyces flavidovirens* DSM 40150, *Streptomyces sclerotialus* NRRL ISP-5269 (= DSM 43032), *Streptomyces catenulae* NRRL B-2342 (= DSM 40258), *Streptomyces ficellus* NRRL 8067 (= DSM 930), *Streptomyces morookaense* DSM 40503, *Streptomyces natalensis* NRRL B-5314 (= DSM 40357), *Streptomyces violens* NRRL ISP-5597 (= DSM 40597), and *Nocardia brevicatena* NBRC12119 (= DSM 43024) were obtained from the German Collection of Microorganisms and Cell Cultures (DSMZ). *Streptomyces* sp. Tü 2975 was obtained from Prof. Heike Brötz-Oesterhelt (University of Tübingen). All strains were grown in medium 65 medium at 28 °C, except *Nocardia brevicatena* NBRC12119 that was grown in medium 82 at 37 °C.

## Gene cloning

gDNA was isolated from each of the actinomycetes using the phenol/chloroform method.<sup>[1]</sup> The genes encoding the enzymes as listed in Table 1 of the main text were amplified from gDNA by using PCR Q5 High-Fidelity DNA Polymerase (New England Biolabs) and the primers pairs listed in Table S1. These primers contain the priming sequences (in regular) and homology arms (in bold underlined) that have homologous sequences to the ends of the linearised pYE-Express vector (EcoRI and HindIII





concentration of enzymes was calculated by Bradford assay<sup>[4]</sup> and the purity of enzymes was checked by SDS-PAGE analysis. Protein yields were 1–5 mg mL<sup>-1</sup>.

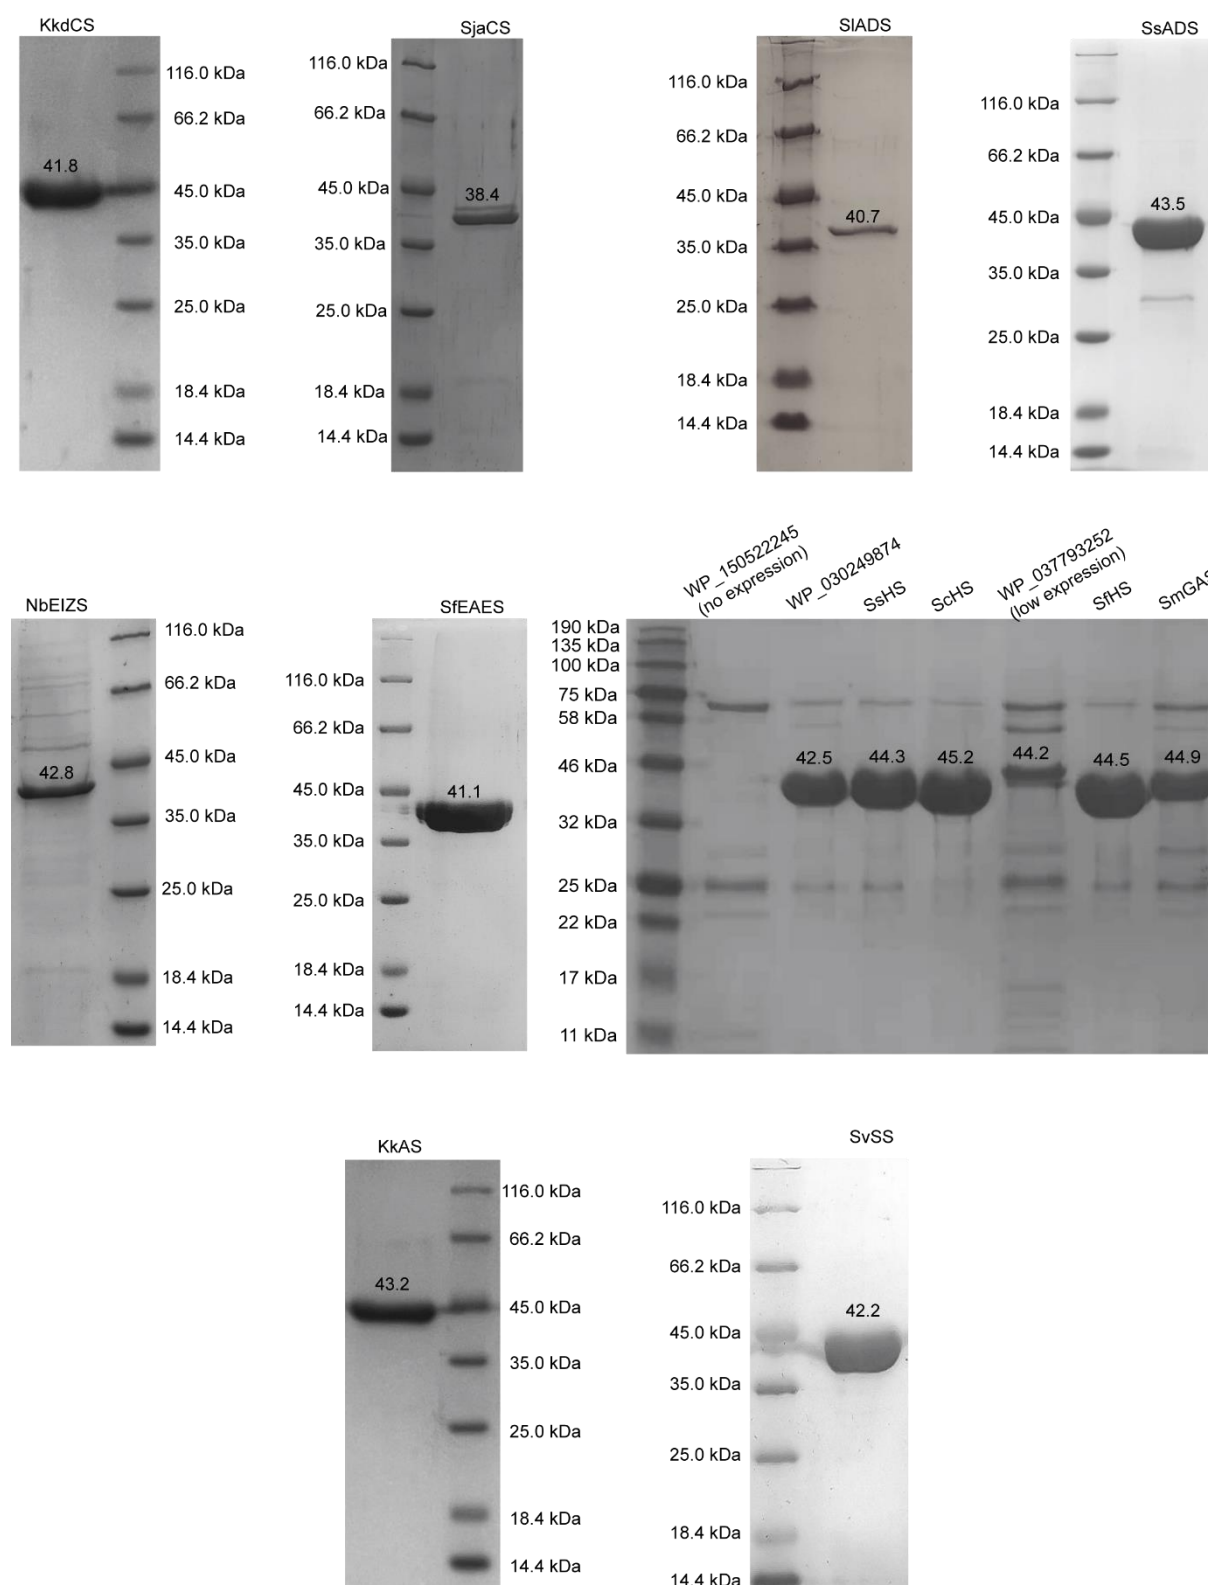

**Figure S1.** SDS-PAGE analysis of recombinant terpene synthases.

### **Incubation experiments and compound isolation**

Test reactions were carried out with GPP, FPP, GGPP and GFPP to identify the substrate scope of recombinant enzymes. The substrate GPP, FPP, GGPP or GFPP (1 mg) was dissolved in substrate buffer (100  $\mu\text{L}$ ; 25 mM  $\text{NH}_4\text{HCO}_3$ ). A protein preparation (final protein concentration: 0.3 mg  $\text{mL}^{-1}$ ) and cyclodextrin (63  $\mu\text{L}$ , 160 mM; final concentration: 10 mM) were added, and the sample was filled to 1 mL with incubation buffer (50 mM Tris/HCl, 10 mM  $\text{MgCl}_2$ , 20% glycerol, pH 8.2). The reaction mixture was incubated at 30  $^\circ\text{C}$  overnight. The product was extracted with hexane (100  $\mu\text{L}$ ), the extract was dried over  $\text{MgSO}_4$  and analysed by GC–MS. Preparative scale reactions were performed by dissolving FPP triammonium salt (80 mg, 185  $\mu\text{mol}$ ) in substrate buffer (10 mL). A protein preparation obtained from 8 L expression culture was diluted with incubation buffer to adjust a protein concentration of 0.3 mg  $\text{mL}^{-1}$ . Cyclodextrin was added (63  $\mu\text{L}/\text{mL}$  at a concentration of 160 mM, final concentration 10 mM). To the resulting mixture the FPP solution was slowly added dropwise and the reactions were incubated at 30  $^\circ\text{C}$  overnight. The mixture was extracted with pentane (3x 100 mL), the organic layers were collected, dried over  $\text{MgSO}_4$ , and the solvent was evaporated in vacuo. The product was purified by silica gel column chromatography.

### **GC–MS analyses**

GC–MS analyses were carried out on a 7890B/5977A series gas chromatography/mass selective detector (Agilent, Santa Clara, CA, USA). The GC was equipped with an HP5-MS fused silica capillary column (30 m, 0.25 mm i. d., 0.50  $\mu\text{m}$  film; Agilent) and operated using the settings: 1) inlet pressure: 77.1 kPa, He at 23.3  $\text{mL min}^{-1}$ , 2) injection volume: 1  $\mu\text{L}$ , 3) temperature program: 5 min at 50  $^\circ\text{C}$ , then increasing by 5  $^\circ\text{C min}^{-1}$  or 10  $^\circ\text{C min}^{-1}$  to 320  $^\circ\text{C}$ , 4) splitless or split ratio 50:1, 60 s valve time, and 5) carrier gas: He at 1  $\text{mL min}^{-1}$ . The MS was operated with the same settings: 1) source: 230  $^\circ\text{C}$ , 2) transfer line: 250  $^\circ\text{C}$ , 3) quadrupole: 150  $^\circ\text{C}$  and 4) electron energy: 70 eV. Retention indices (*I*) were determined from a homologous series of *n*-alkanes ( $\text{C}_7$ – $\text{C}_{40}$ ).

### **NMR spectroscopy**

NMR spectra were recorded on a Bruker (Billerica, MA, USA) Avance III HD Cryo (700 MHz) and AV III HD Prodigy (500 MHz) NMR spectrometer. Spectra were referenced

against solvent signals ( $^1\text{H-NMR}$ , residual proton signals:  $\text{CDCl}_3$   $\delta = 7.26$  ppm,  $\text{C}_6\text{D}_6$   $\delta = 7.16$ ,  $\text{D}_2\text{O}$   $\delta = 4.79$ ;  $^{13}\text{C-NMR}$ :  $\text{CDCl}_3$   $\delta = 77.16$  ppm,  $\text{C}_6\text{D}_6$   $\delta = 128.06$  ppm).<sup>[5]</sup>

MTICDTTLLWCPIPPGIHPNWRQWERDTVAVLESFALEDEQREKKRLQAI IAGELAGRTILS  
CDDPPGAQFSTDSLWMLFAFDDAYCDEGRYSHDPAAMAMLVAEMGRIAETGRTVSTSP LARA  
LAELRSRLDVLASPAQTARWVHAMKGYLGYQVWEAAFRHTGTIPTLDEYAVARIRNGSMEVC  
AMTLDIAEGYEVPAAEIDRPDVRALTEMACSLVGWVNDIASYYKEHERSGDRINLVDVIADQ  
KGSTPAEALPSAIALRDAVLARYLELRDEIEPHVGS LTWRYIGGLSAWIRGNLDWSANTARY  
RRPDCPTVAVTSSREYATGDCPQPPGIAWWW TADPTQPAAA

**Figure S2.** Amino acid sequence of KkdCS (MBB5895433). Highly conserved residues are highlighted in yellow.

**$\delta$ -Cadinol (10).** This compound was isolated by column chromatography on silica gel with petrol ether / Et<sub>2</sub>O (4:1). Yield: 5.5 mg, 25.0  $\mu$ mol, 14%, from 80.0 mg (185  $\mu$ mol) FPP triammonium salt. TLC (ether / Et<sub>2</sub>O = 4:1):  $R_f$  = 0.3. GC (HP-5MS):  $I$  = 1665. Optical rotary power:  $[\alpha]_D^{25} = +95.9$  ( $c$  0.55, CH<sub>2</sub>Cl<sub>2</sub>). The EI mass spectrum is shown in Figure 3B of main text and NMR data are given in Table S2.



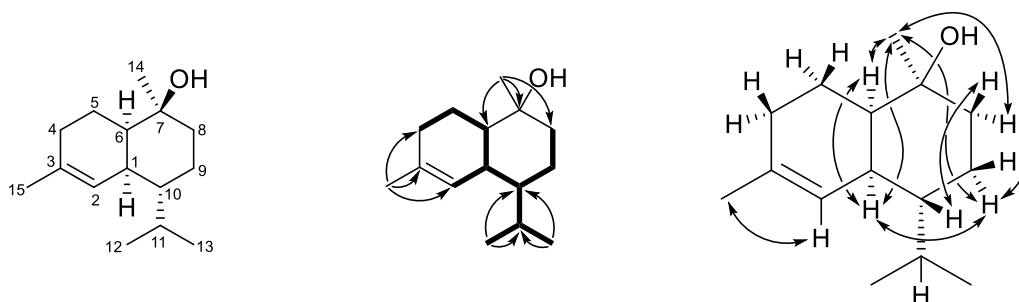

**Figure S3.** Structure elucidation of  $\delta$ -cadinol (**10**). Bold:  $^1\text{H},^1\text{H}$ -COSY, single headed arrows: key HMBC, and double headed arrows: NOESY correlations.

**Table S2.** NMR data of **10** in  $\text{C}_6\text{D}_6$  recorded at 298 K.

| <b>10</b>        |                 |                                |                                                                                           |
|------------------|-----------------|--------------------------------|-------------------------------------------------------------------------------------------|
| C <sup>[a]</sup> | type            | <sup>13</sup> C <sup>[b]</sup> | <sup>1</sup> H <sup>[b]</sup>                                                             |
| 1                | CH              | 37.18                          | 1.97 (m)                                                                                  |
| 2                | CH              | 125.23                         | 5.57 (dq, $J = 5.5, 1.5$ ).                                                               |
| 3                | Cq              | 134.32                         | –                                                                                         |
| 4                | CH <sub>2</sub> | 31.60                          | 1.92 (m, 2H)                                                                              |
| 5                | CH <sub>2</sub> | 18.89                          | 2.00 (m)<br>1.52 (m)                                                                      |
| 6                | CH              | 46.04                          | 1.54 (m)                                                                                  |
| 7                | Cq              | 71.67                          | –                                                                                         |
| 8                | CH <sub>2</sub> | 35.64                          | 1.50 (m, H <sub><math>\beta</math></sub> )<br>1.36 (m, H <sub><math>\alpha</math></sub> ) |
| 9                | CH <sub>2</sub> | 21.92                          | 1.34 (m, H <sub><math>\beta</math></sub> )<br>0.96 (m, H <sub><math>\alpha</math></sub> ) |
| 10               | CH              | 44.54                          | 1.32 (m)                                                                                  |
| 11               | CH              | 26.80                          | 2.00 (m)                                                                                  |
| 12               | CH <sub>3</sub> | 15.50                          | 0.77 (d, $J = 6.9, 3\text{H}$ )                                                           |
| 13               | CH <sub>3</sub> | 21.87                          | 0.85 (d, $J = 7.0, 3\text{H}$ )                                                           |
| 14               | CH <sub>3</sub> | 28.34                          | 1.15 (s, 3H)                                                                              |
| 15               | CH <sub>3</sub> | 23.86                          | 1.63 (br s, 3H)                                                                           |

[a] Carbon numbering as shown in Figure S3. [b] Chemical shifts  $\delta$  in ppm; multiplicity: s = singlet, d = doublet, q = quartet, m = multiplet, br = broad; coupling constants  $J$  are given in Hertz.

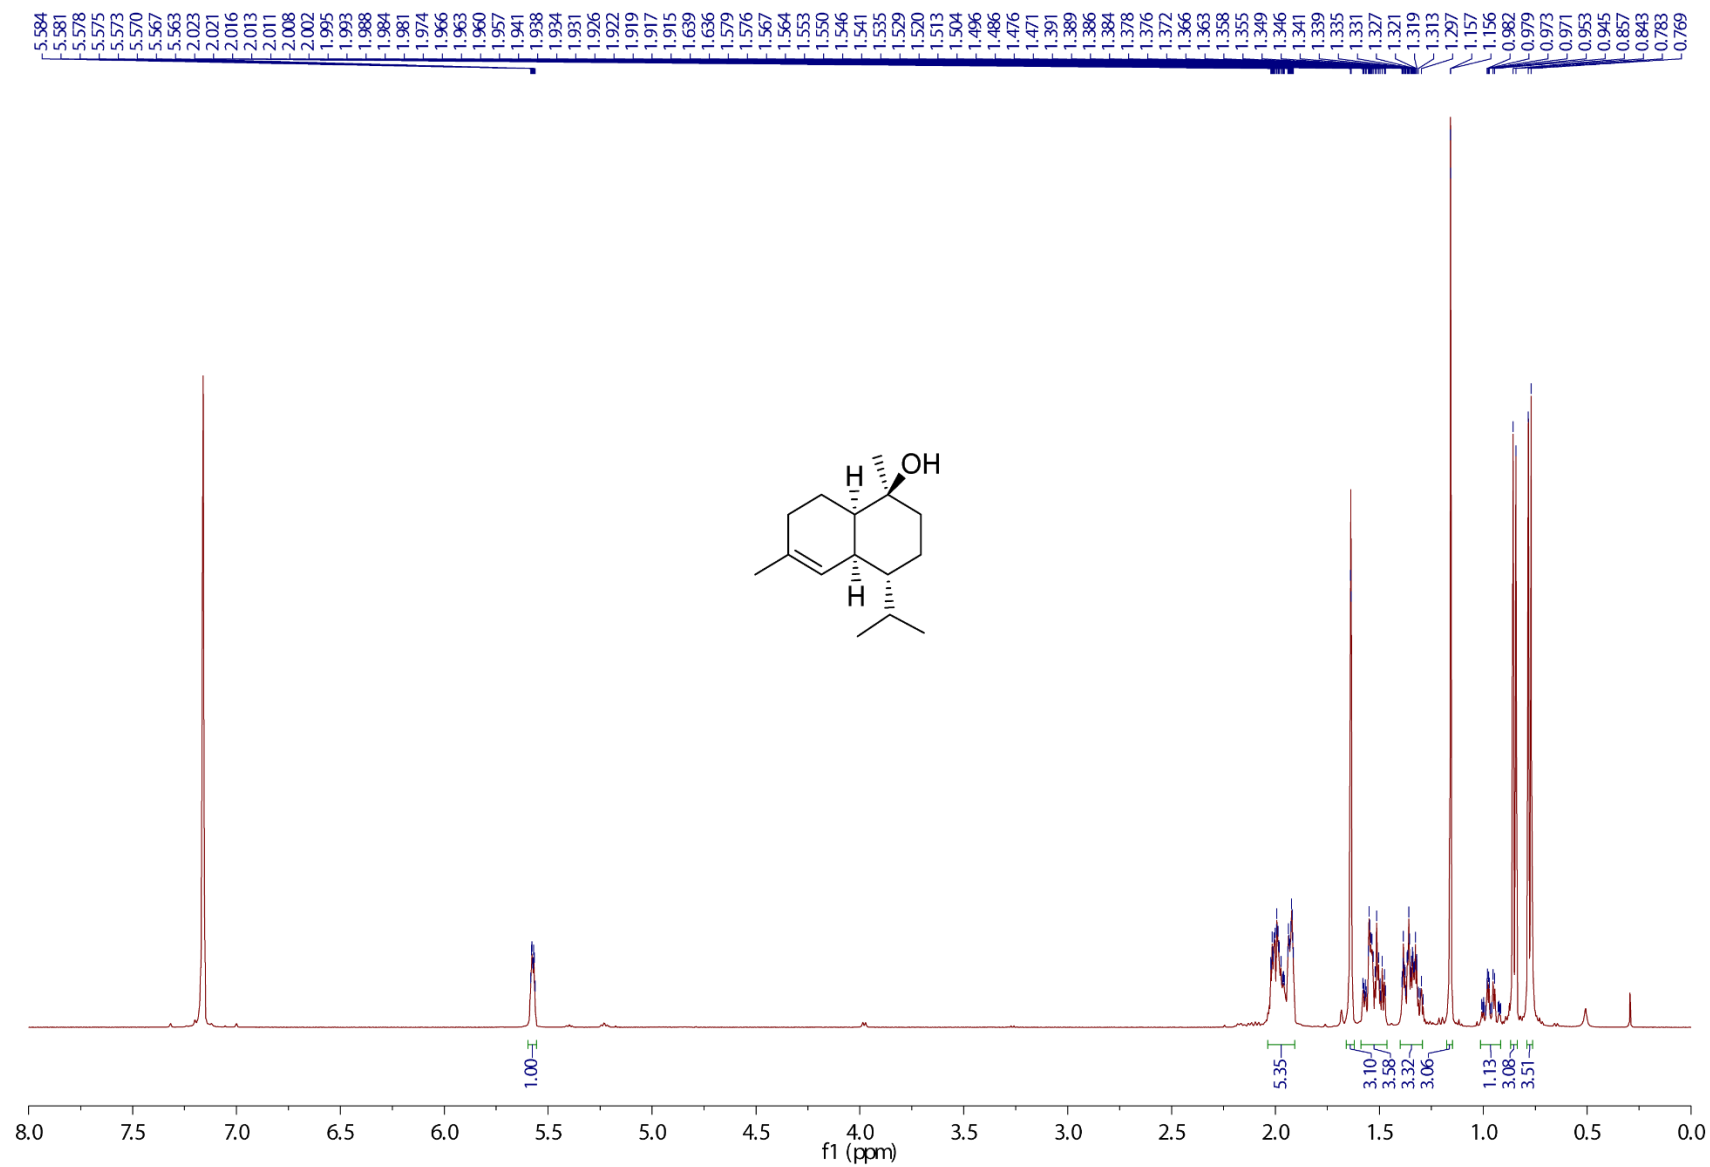

**Figure S4.** <sup>1</sup>H NMR spectrum of **10** (500 MHz, C<sub>6</sub>D<sub>6</sub>).

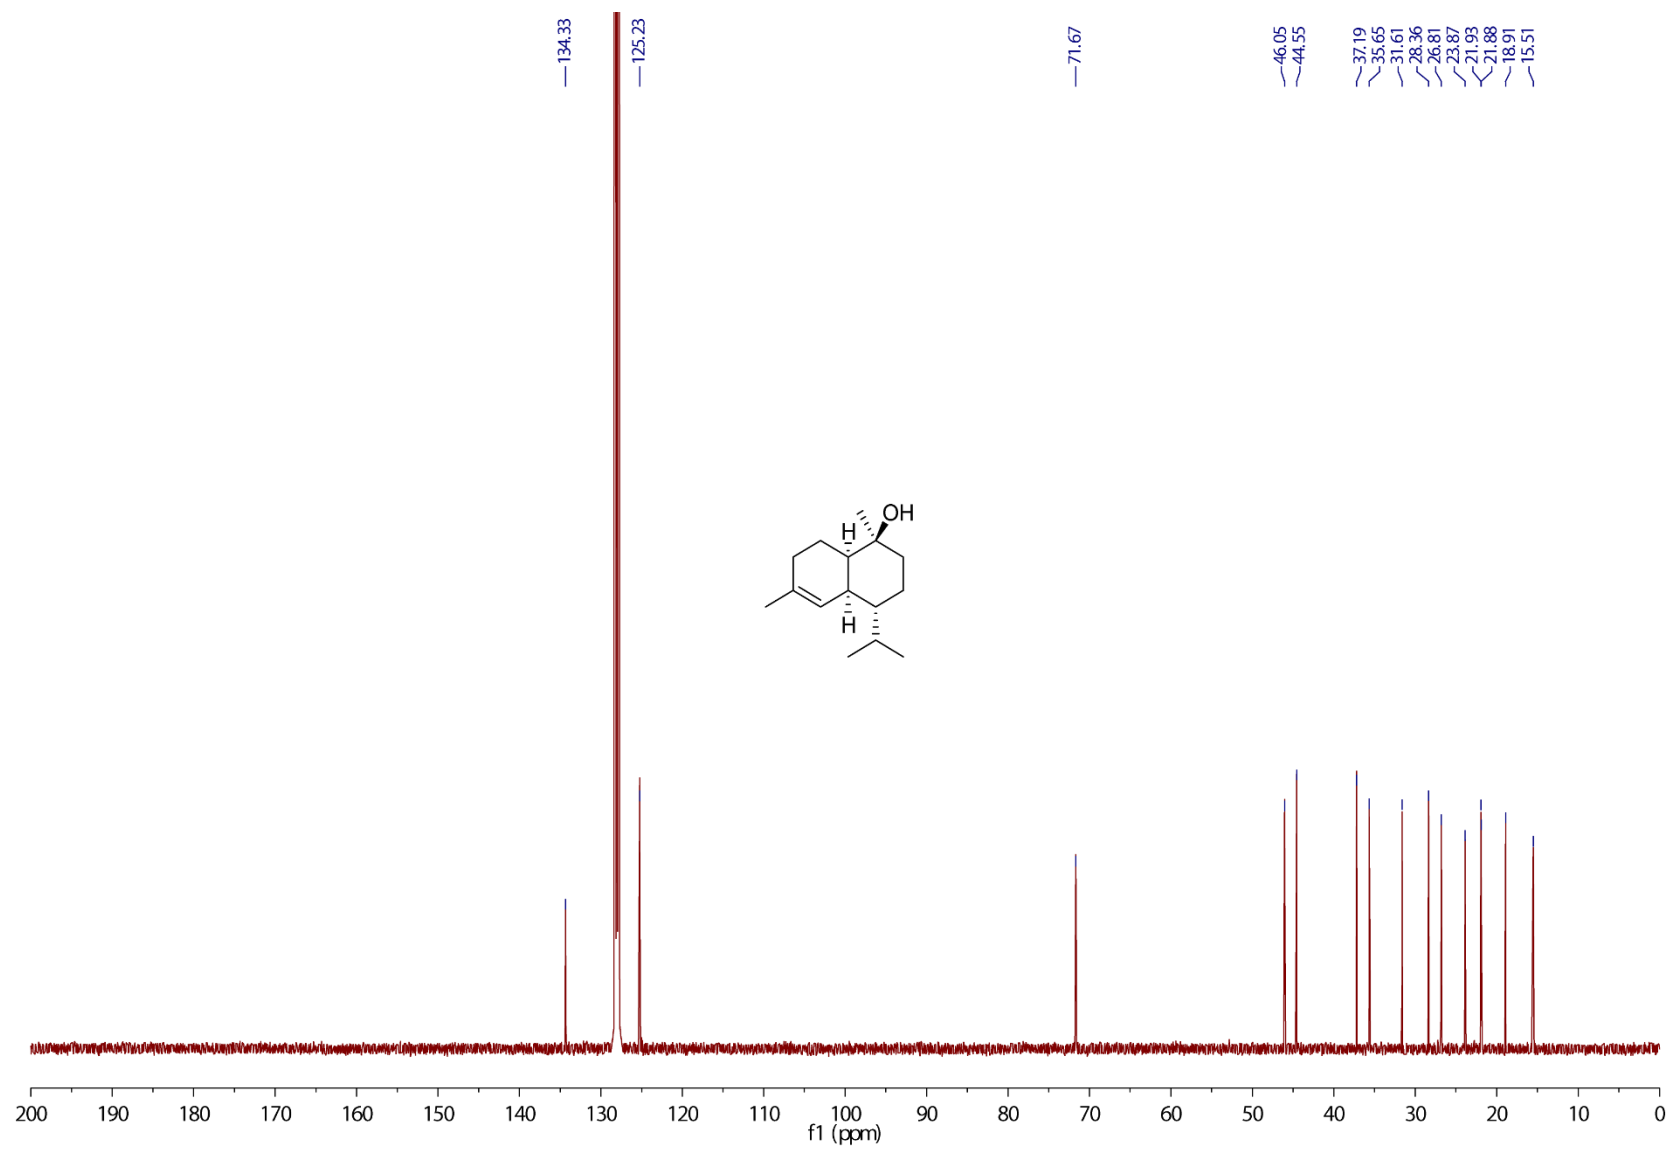

**Figure S5.**  $^{13}\text{C}$  NMR spectrum of **10** (126 MHz,  $\text{C}_6\text{D}_6$ ).

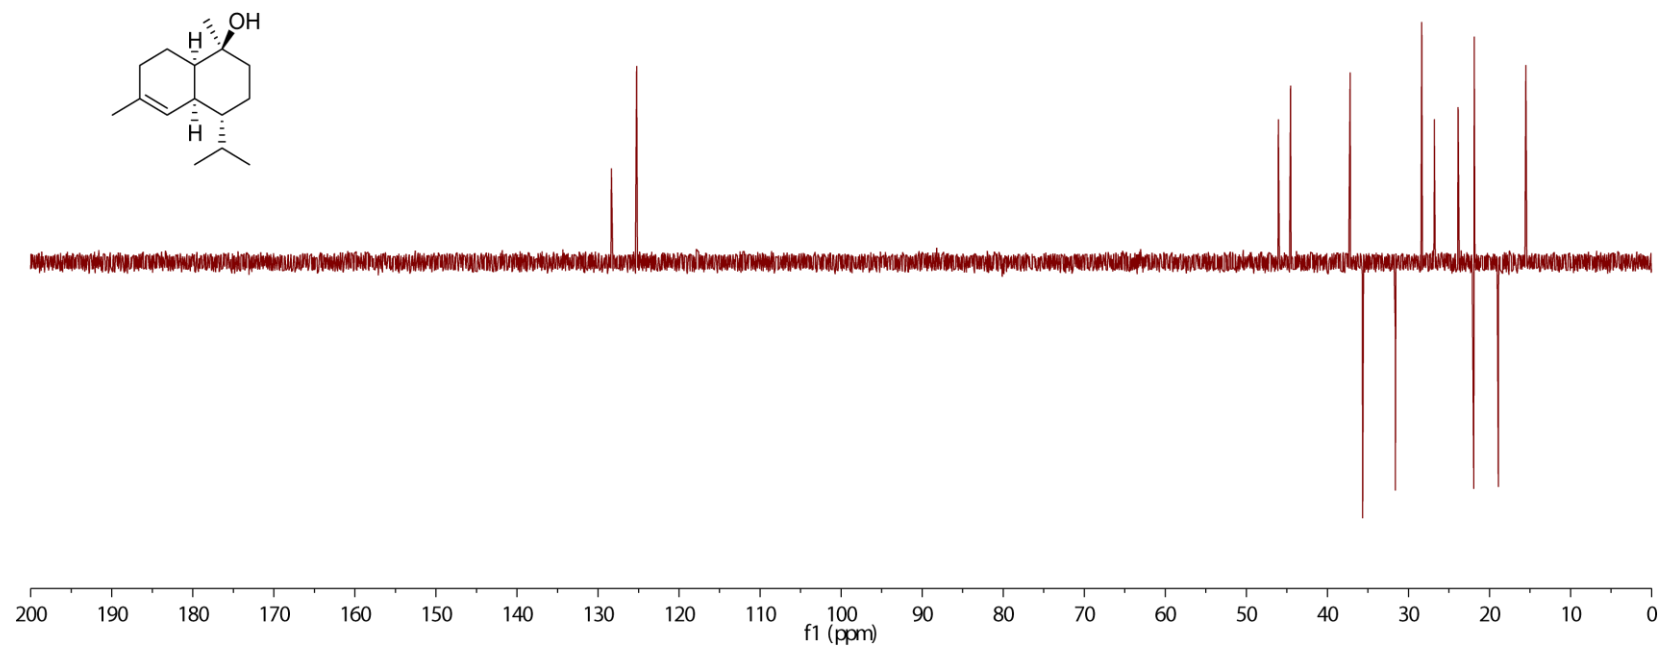

**Figure S6.**  $^{13}\text{C}$ -DEPT135 spectrum of **10** (126 MHz,  $\text{C}_6\text{D}_6$ ).

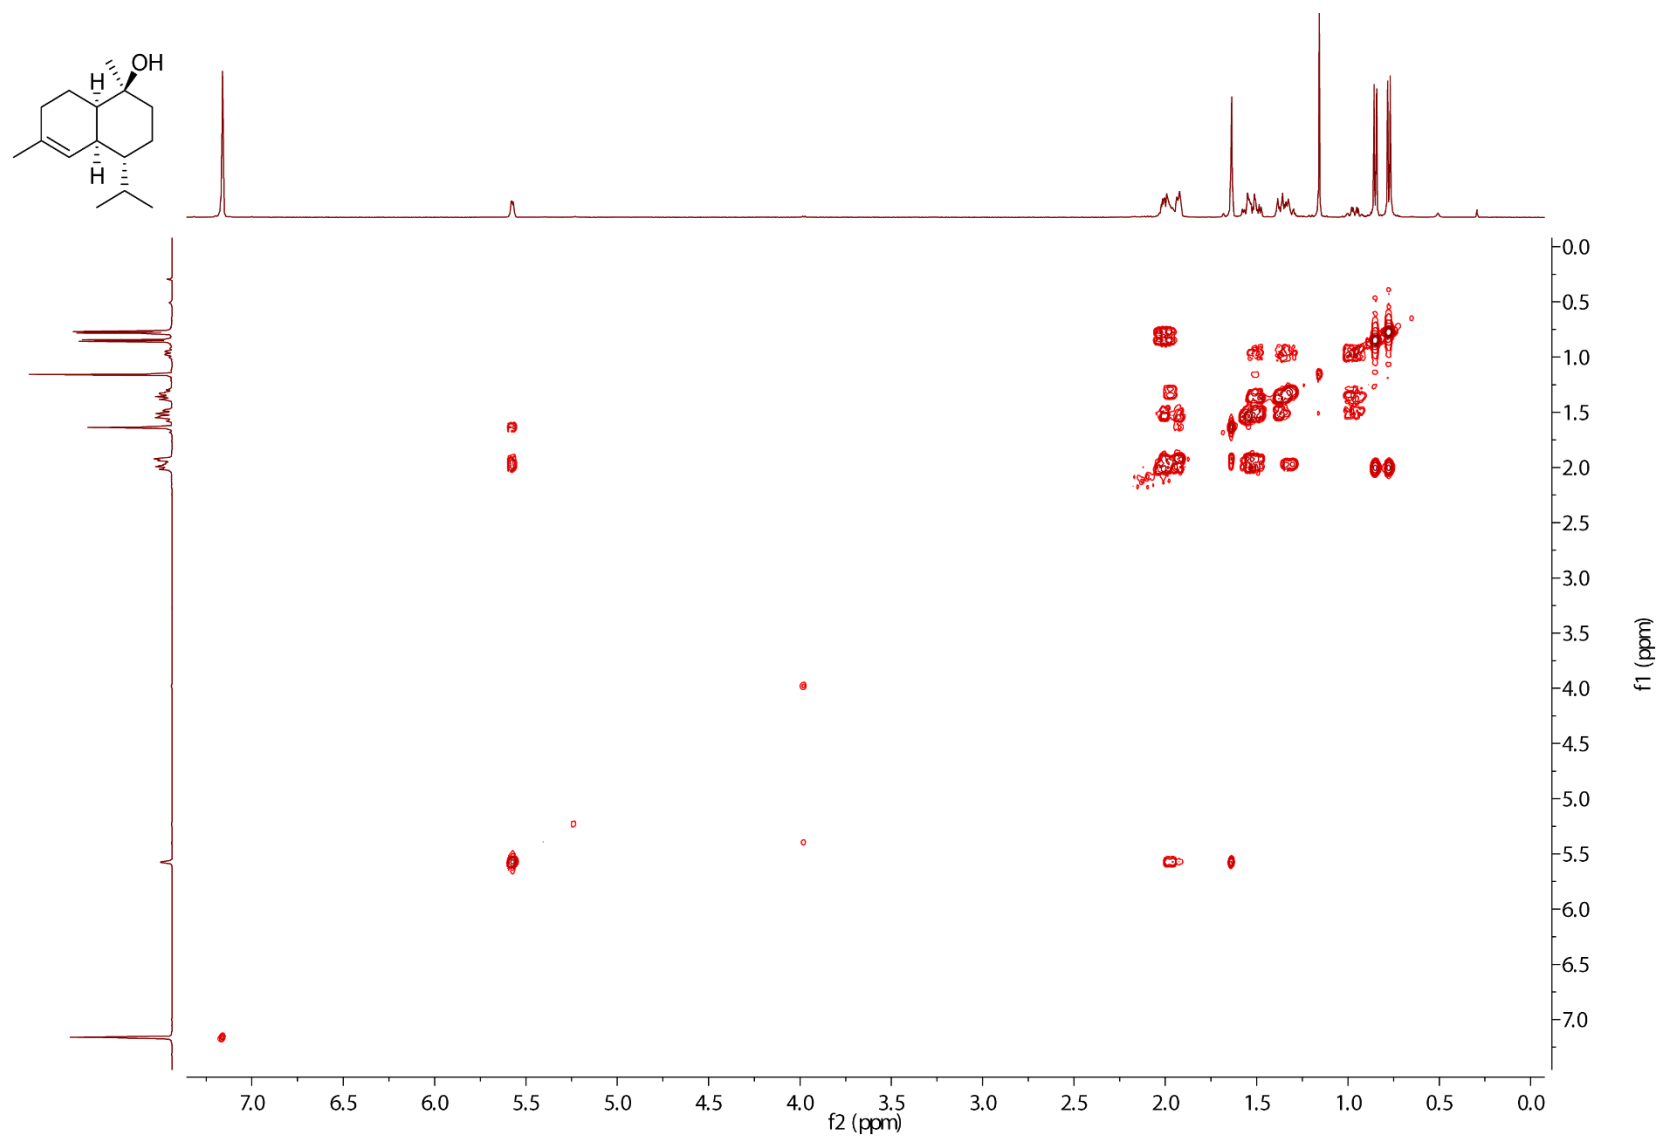

**Figure S7.**  $^1\text{H}$ ,  $^1\text{H}$ -COSY spectrum ( $\text{C}_6\text{D}_6$ ) of **10**.

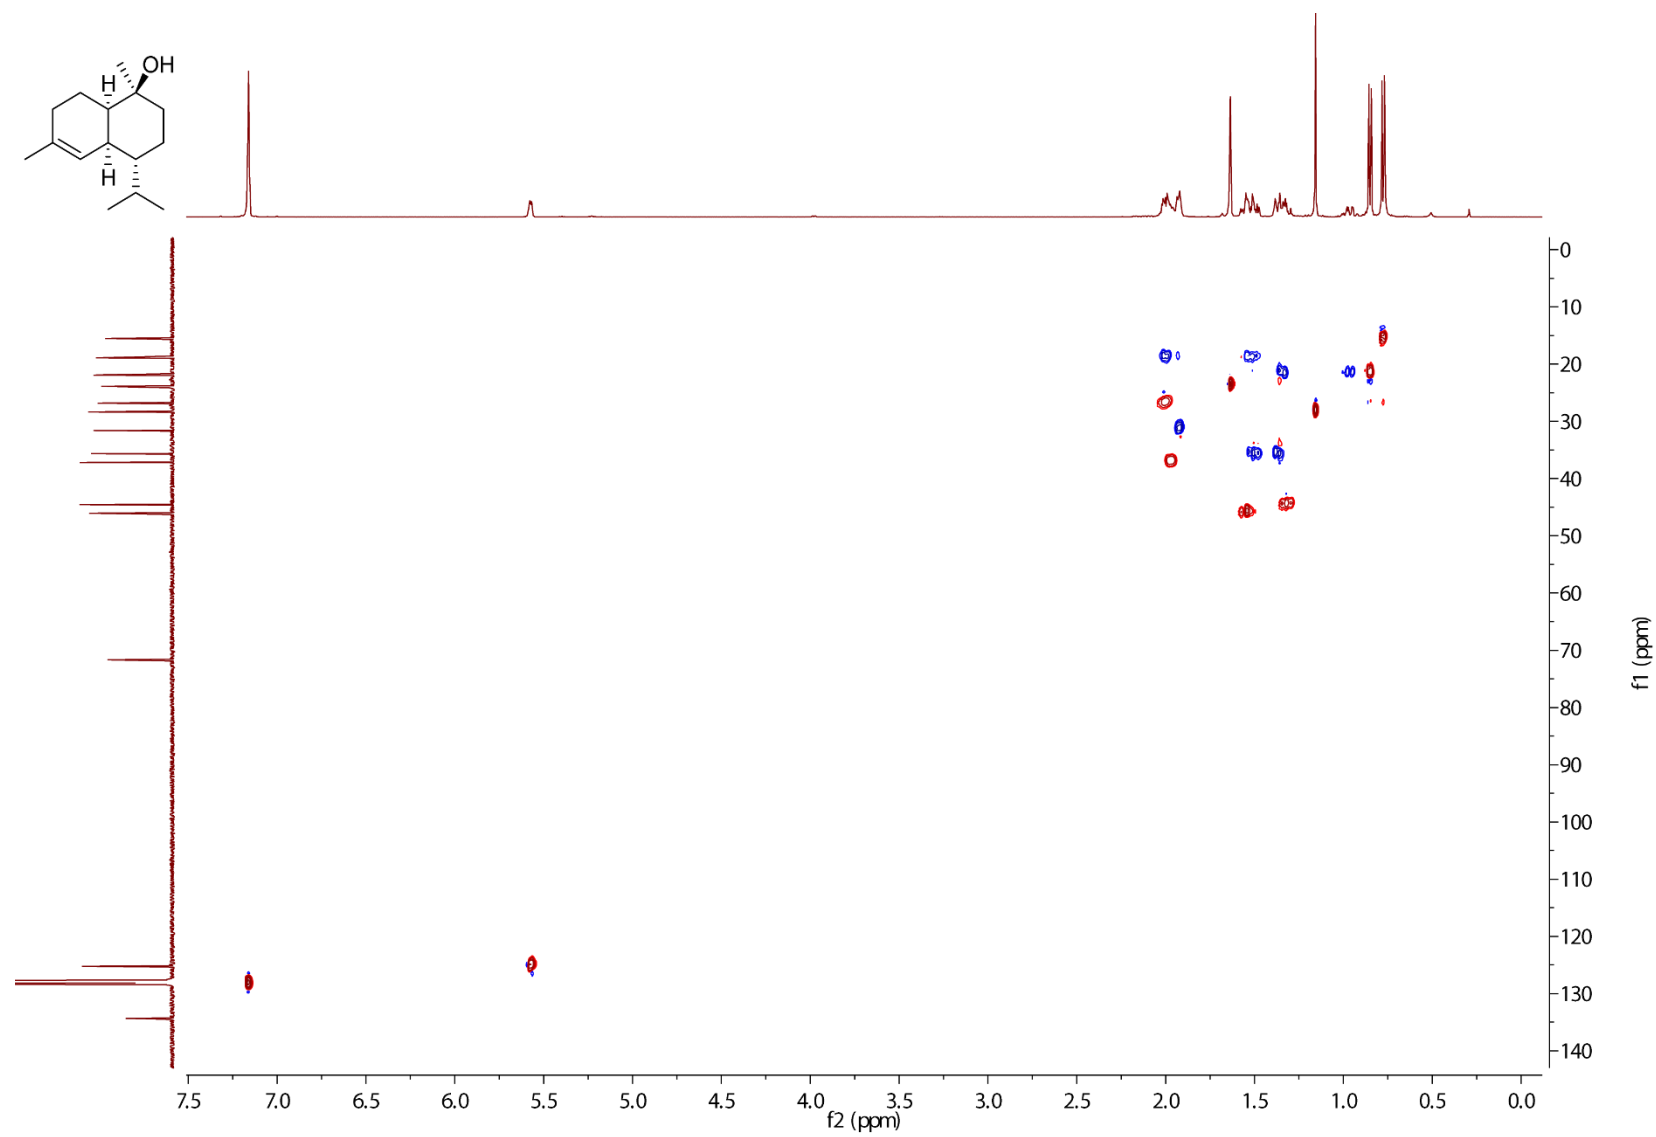

**Figure S8.** HSQC spectrum (C<sub>6</sub>D<sub>6</sub>) of **10**.

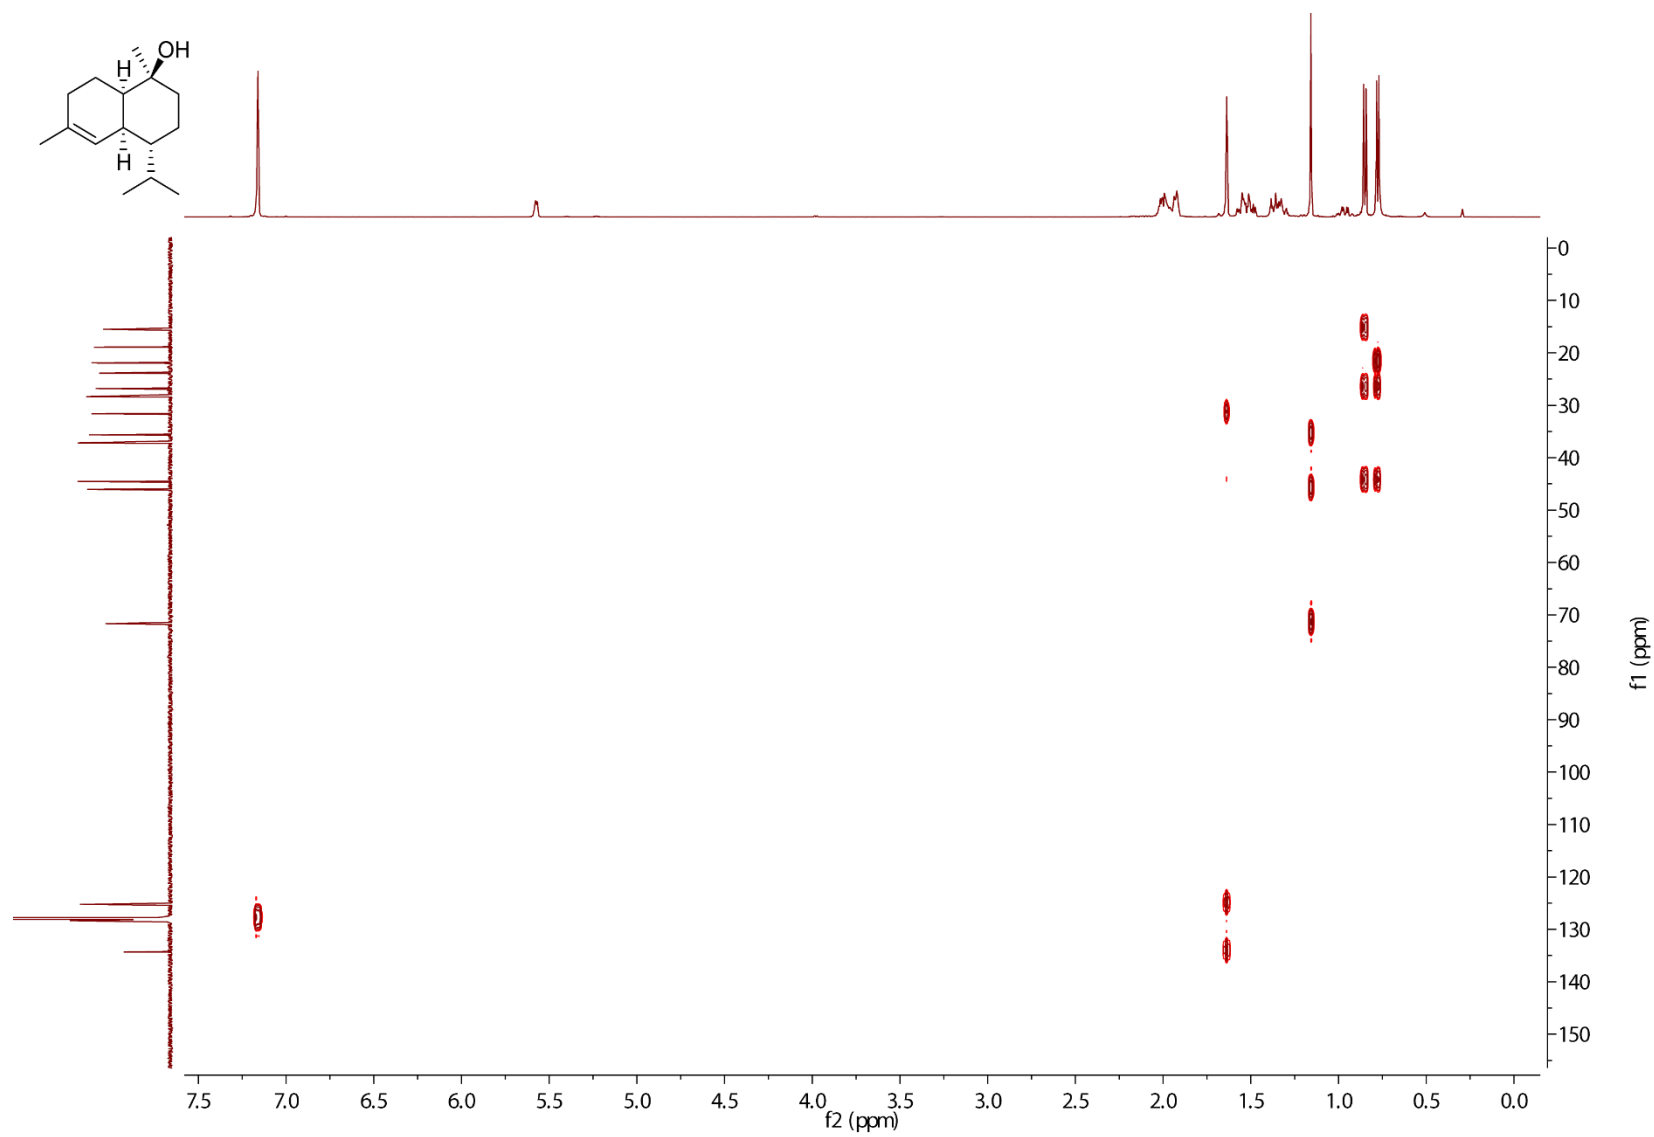

**Figure S9.** HMBC spectrum ( $C_6D_6$ ) of **10**.

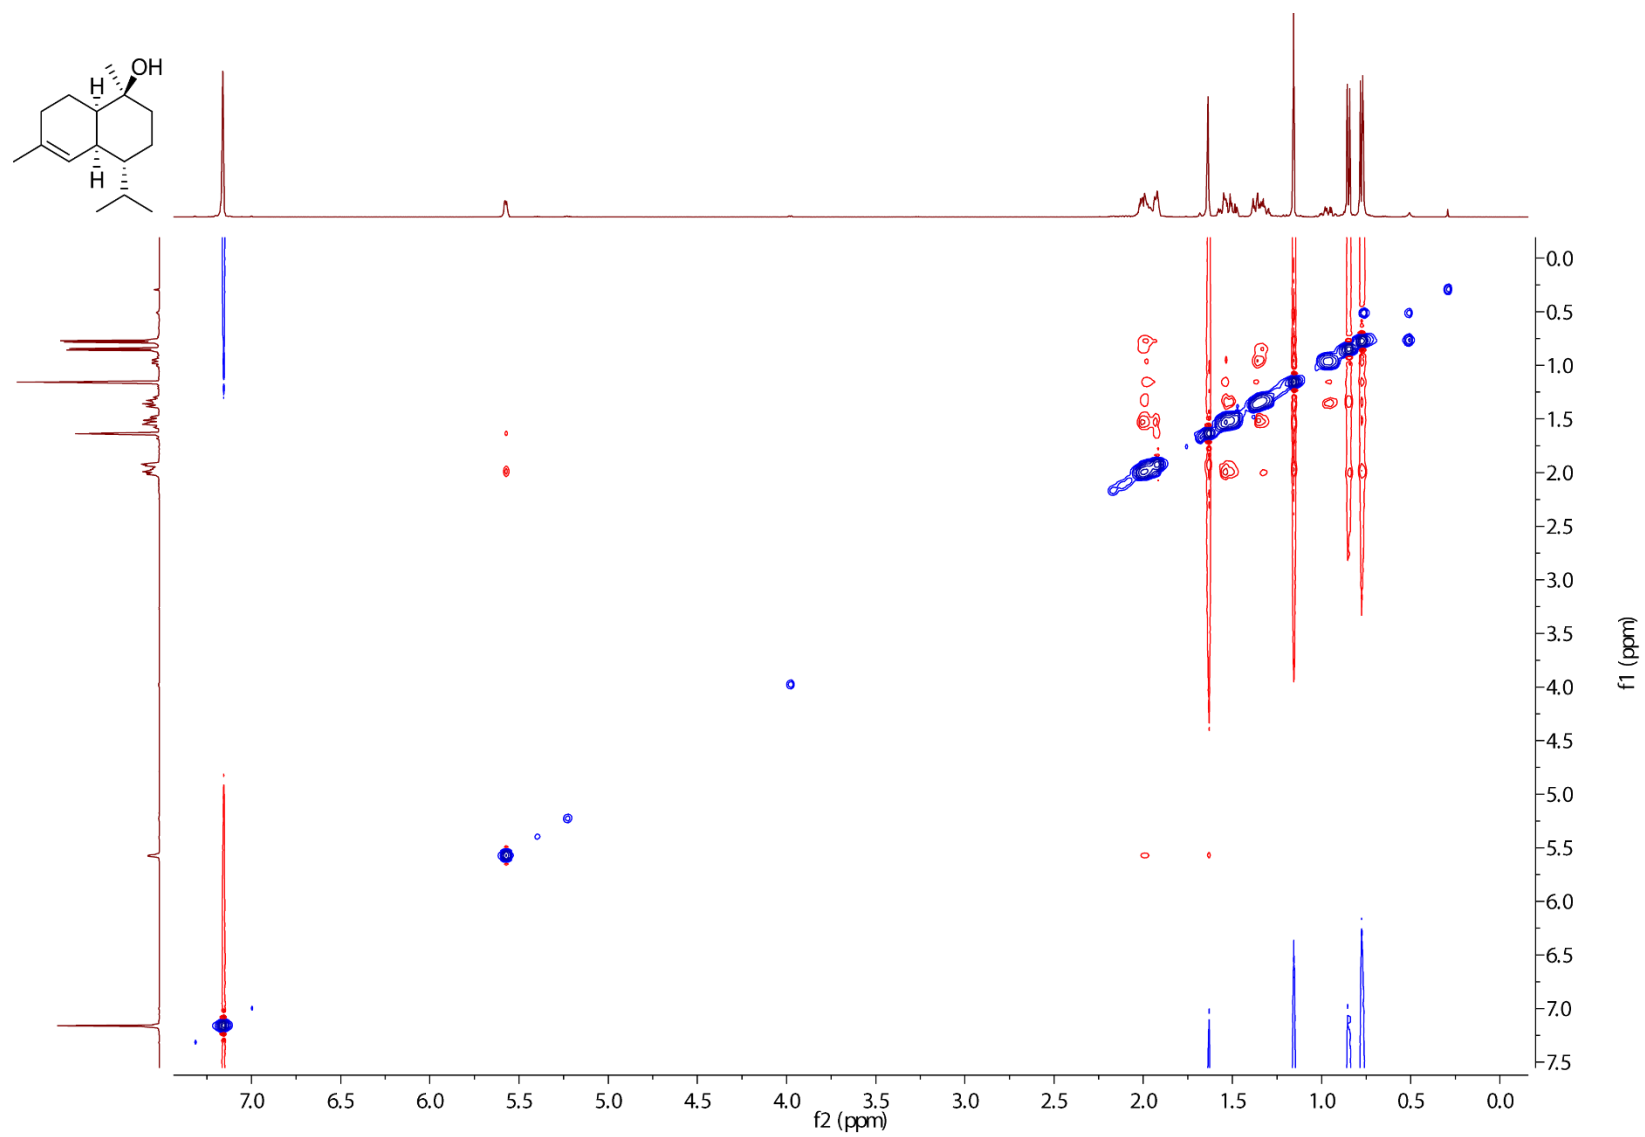

**Figure S10.** NOESY spectrum ( $C_6D_6$ ) of **10**.



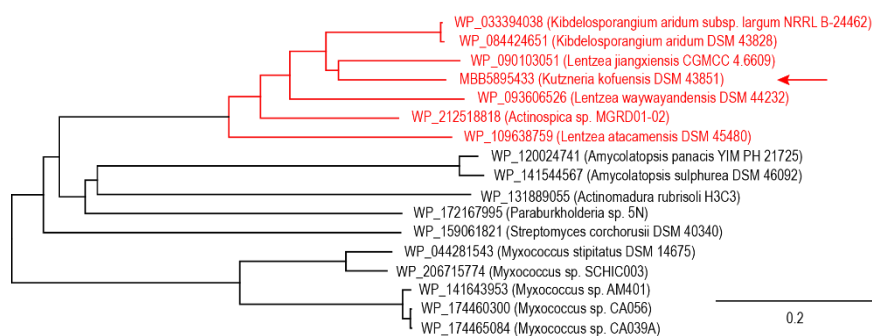

**Figure S11.** Detailed section of the phylogenetic tree shown in Figure 2 of main text. The red arrow indicates the characterised  $\delta$ -cadinol synthase (KkdCS). The closely related enzymes shown in red share a pairwise identity of 69% and may have the same function.

MAPPLRIPPLHCPFPDDVHPEADTIDRTSLRWLDRFGLITDPATRARFGQSKIGWQASRTTP  
HADAELVQLHSDWQMWLFAFDDVRSEESEAGGHPGRMARSLVPCLRILEDPDTPVRDEDPFT  
AALRDLRRHLGLVAGPLQLDRFITSVLGYWFAQVWEAGNRADAVWPTVEEYTAMRVHTGAVP  
TCLALIDVVGRFELPAAELARHEVKALTTKAVNVVCWANNDIHSYEKEAARSSHPVNLPTLLH  
RRDGGTVQAAIDLAARMHDDEVAAYVELRSRVTAGPELERYLDGLQSWMRGNLTWSLSTGRY  
RQTPVQS

**Figure S12.** Amino acid sequence of SjaCS (WP\_153520876). Highly conserved residues are highlighted in yellow.

**$\alpha$ -Cadinene (11).** This compound was isolated through silica gel column chromatography with pentane. Yield: 1.3 mg, 6.4  $\mu$ mol, 3.5%, from 80 mg (185  $\mu$ mol) FPP triammonium salt. TLC (pentane):  $R_f$  = 0.72. GC (HP-5MS):  $I$  = 1560. Optical rotary power:  $[\alpha]_D^{25} = +60.0$  (c 0.015, C<sub>6</sub>H<sub>6</sub>). The EI mass spectrum is shown in Figure 3D of main text and NMR data are given in Table S3.

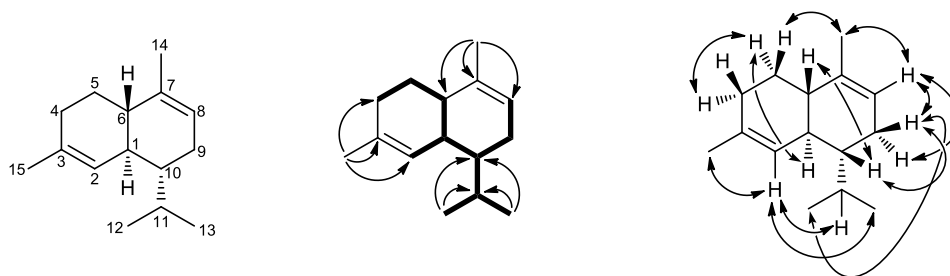

**Figure S13.** Structure elucidation of  $\alpha$ -cadinene (**11**). Bold:  $^1\text{H},^1\text{H}$ -COSY, single headed arrows: key HMBC, and double headed arrows: NOESY correlations.

**Table S3.** NMR data of **11** in  $\text{C}_6\text{D}_6$  recorded at 298 K.

| <b>11</b>        |               |                       |                                                             |
|------------------|---------------|-----------------------|-------------------------------------------------------------|
| $\text{C}^{[a]}$ | type          | $^{13}\text{C}^{[b]}$ | $^1\text{H}^{[b]}$                                          |
| 1                | CH            | 41.57                 | 1.97 (m, $\text{H}_\alpha$ )                                |
| 2                | CH            | 122.90                | 5.72 (br s)                                                 |
| 3                | $\text{C}_q$  | 122.90                | –                                                           |
| 4                | $\text{CH}_2$ | 31.64                 | 1.97 (m, $\text{H}_\alpha$ )<br>1.91 (m, $\text{H}_\beta$ ) |
| 5                | $\text{CH}_2$ | 27.09                 | 2.02 (m, $\text{H}_\beta$ )<br>1.25 (m, $\text{H}_\alpha$ ) |
| 6                | CH            | 43.05                 | 1.94 (m, $\text{H}_\beta$ )                                 |
| 7                | $\text{C}_q$  | 135.71                | –                                                           |
| 8                | CH            | 122.50                | 5.45 (br s)                                                 |
| 9                | $\text{CH}_2$ | 25.37                 | 1.90 (m, $\text{H}_\beta$ )<br>1.83 (m, $\text{H}_\alpha$ ) |
| 10               | CH            | 42.79                 | 1.51 (m, $\text{H}_\beta$ )                                 |
| 11               | CH            | 26.68                 | 2.20 (m)                                                    |
| 12               | $\text{CH}_3$ | 14.72                 | 0.80 (d, $J = 6.9$ )                                        |
| 13               | $\text{CH}_3$ | 21.12                 | 0.87 (d, $J = 7.0$ )                                        |
| 14               | $\text{CH}_3$ | 21.00                 | 1.69 (br s)                                                 |
| 15               | $\text{CH}_3$ | 23.99                 | 1.67 (br s)                                                 |

[a] Carbon numbering as shown in Figure S13. [b] Chemical shifts  $\delta$  in ppm; multiplicity: s = singlet, d = doublet, m = multiplet, br = broad; coupling constants  $J$  are given in Hertz.

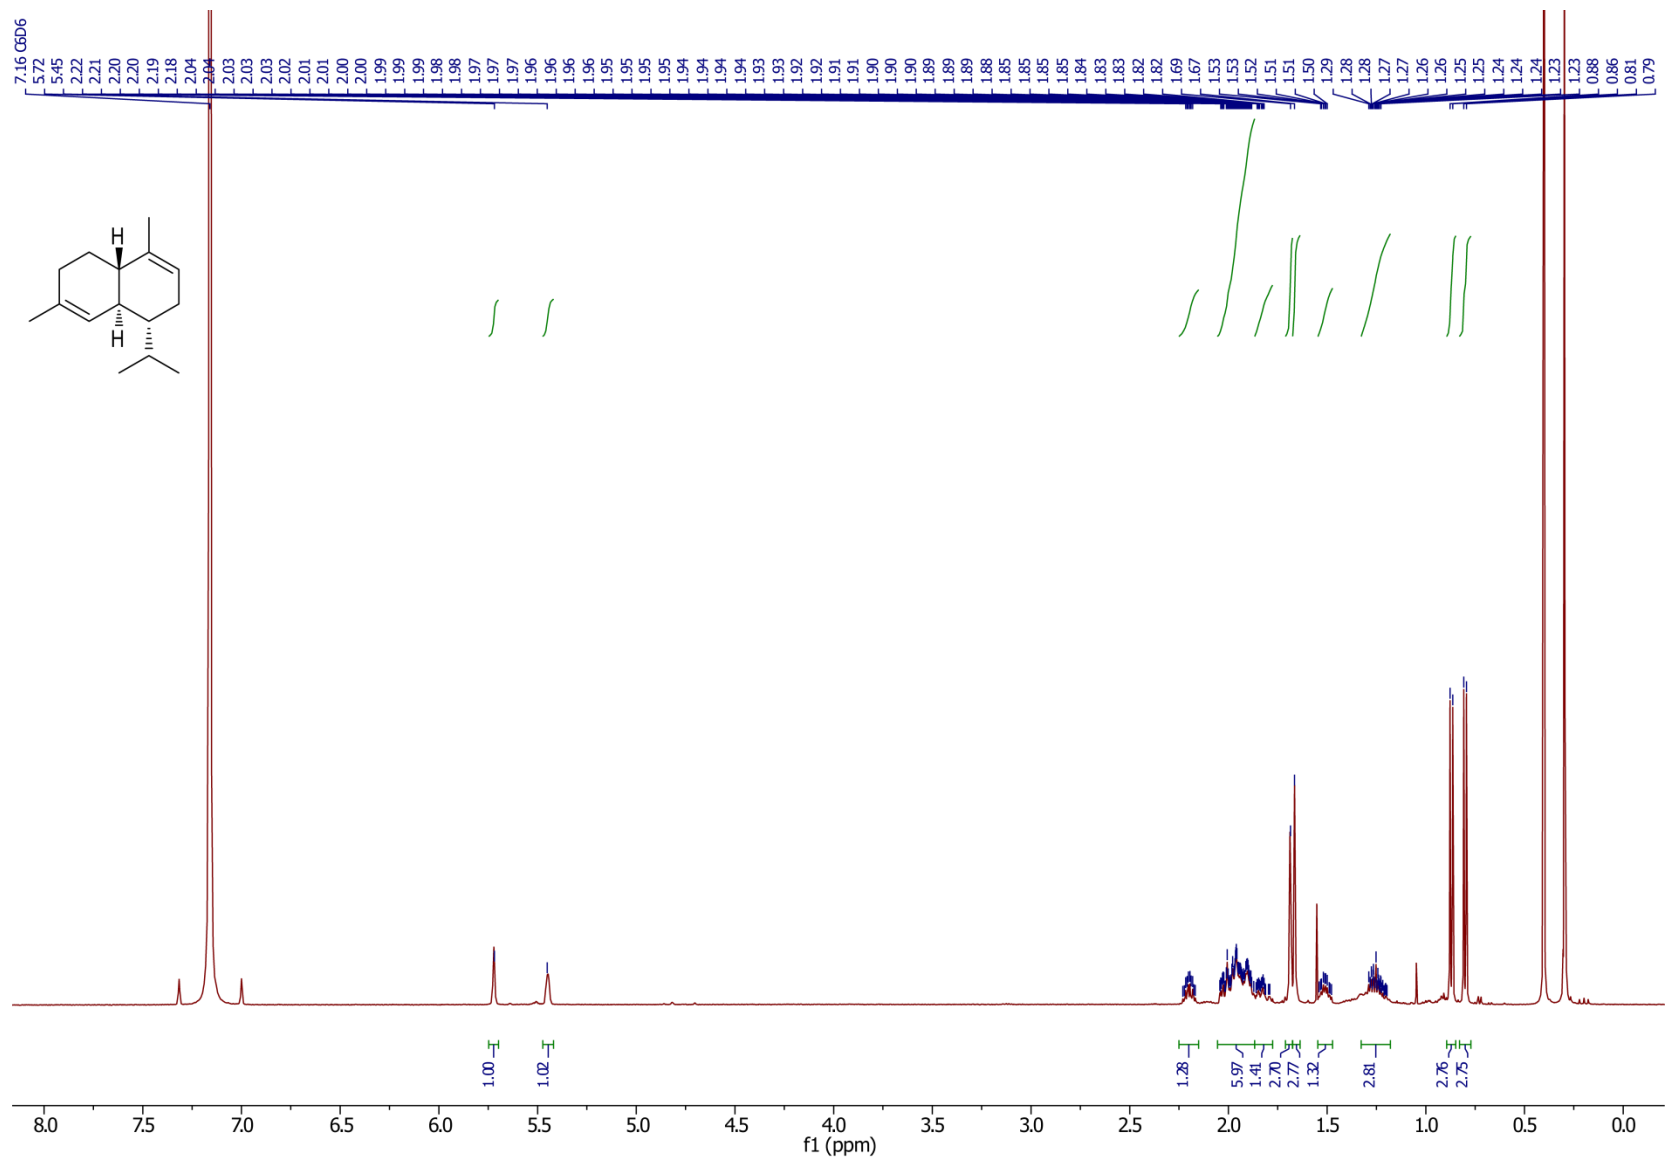

**Figure S14.** <sup>1</sup>H NMR spectrum of **11** (500 MHz, C<sub>6</sub>D<sub>6</sub>).

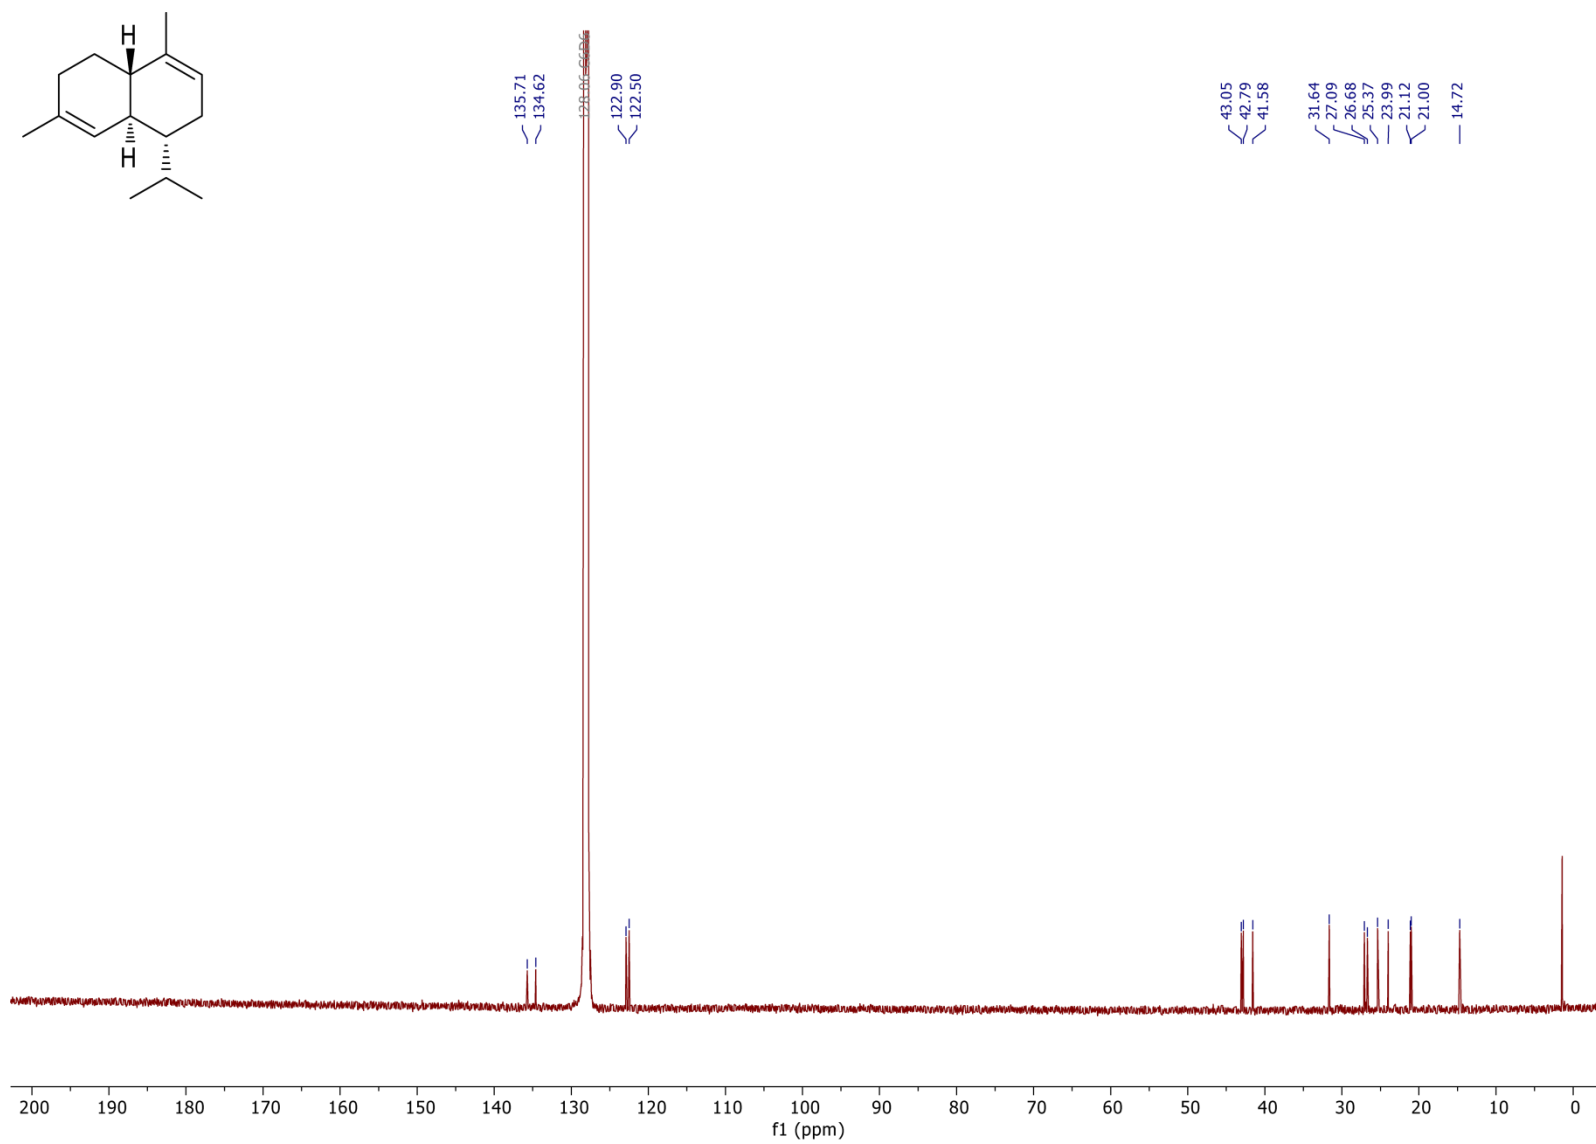

**Figure S15.** <sup>13</sup>C NMR spectrum of **11** (125 MHz, C<sub>6</sub>D<sub>6</sub>).

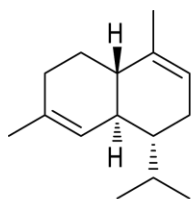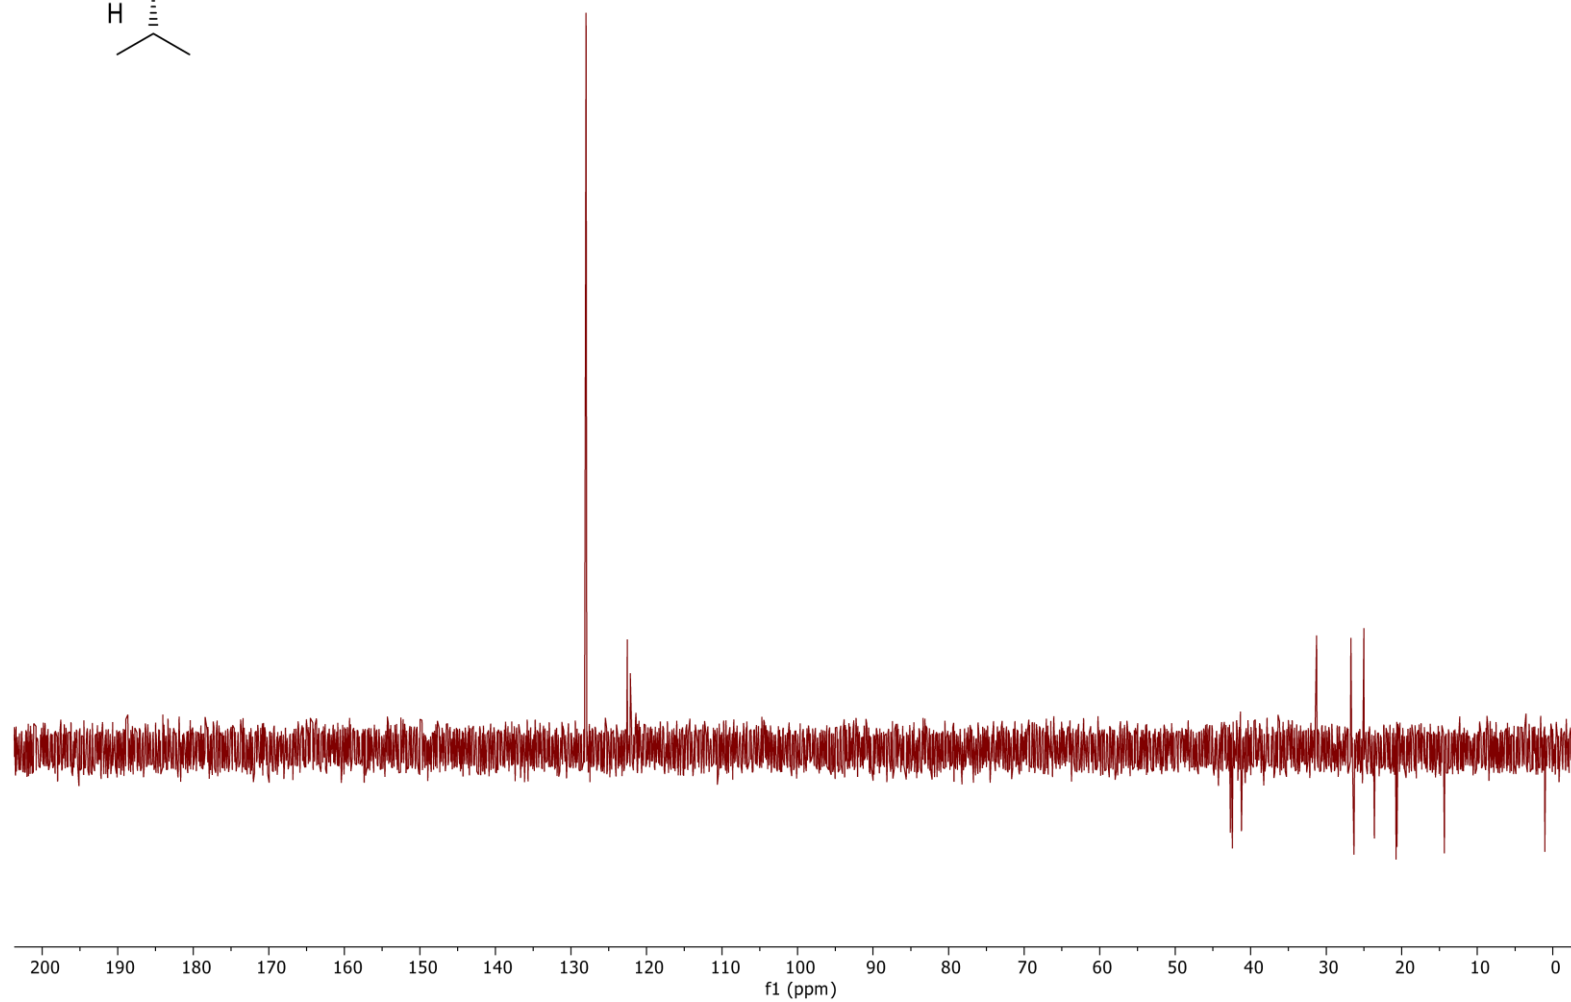

**Figure S16.**  $^{13}\text{C}$ -DEPT135 spectrum of **11** (125 MHz,  $\text{C}_6\text{D}_6$ ).

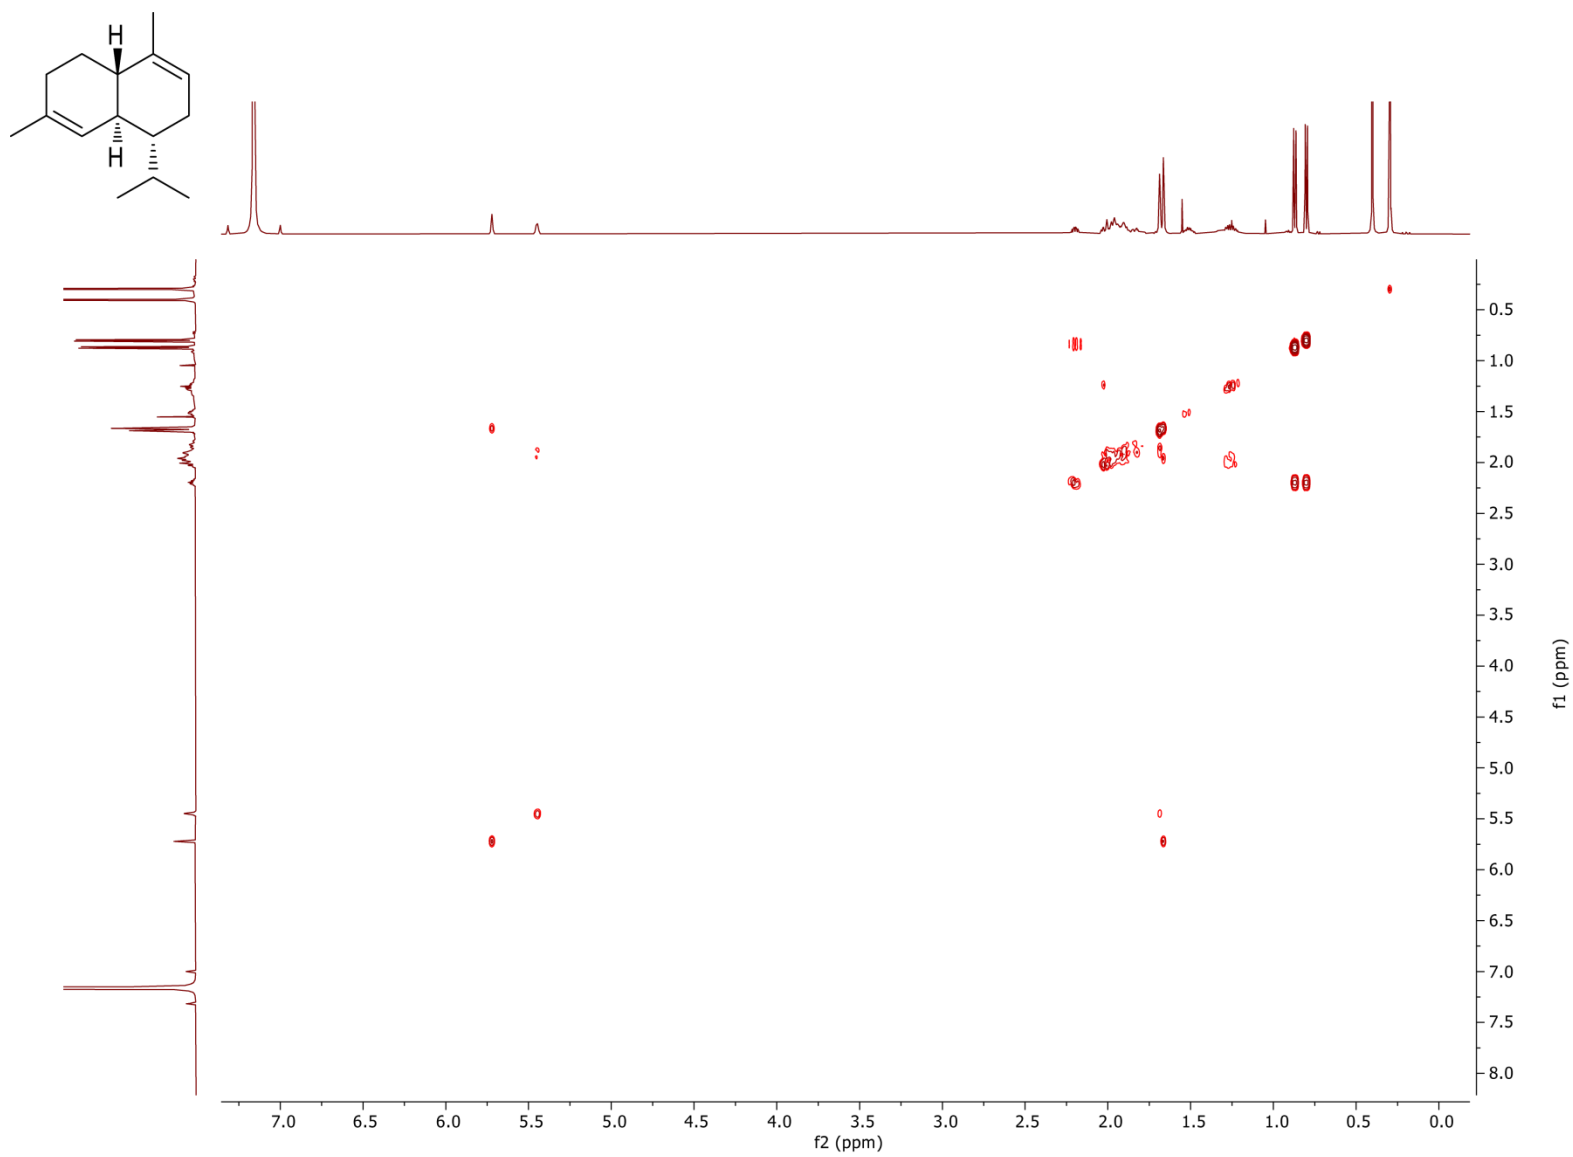

**Figure S17.**  $^1\text{H}$ ,  $^1\text{H}$ -COSY spectrum ( $\text{C}_6\text{D}_6$ ) of **11**.

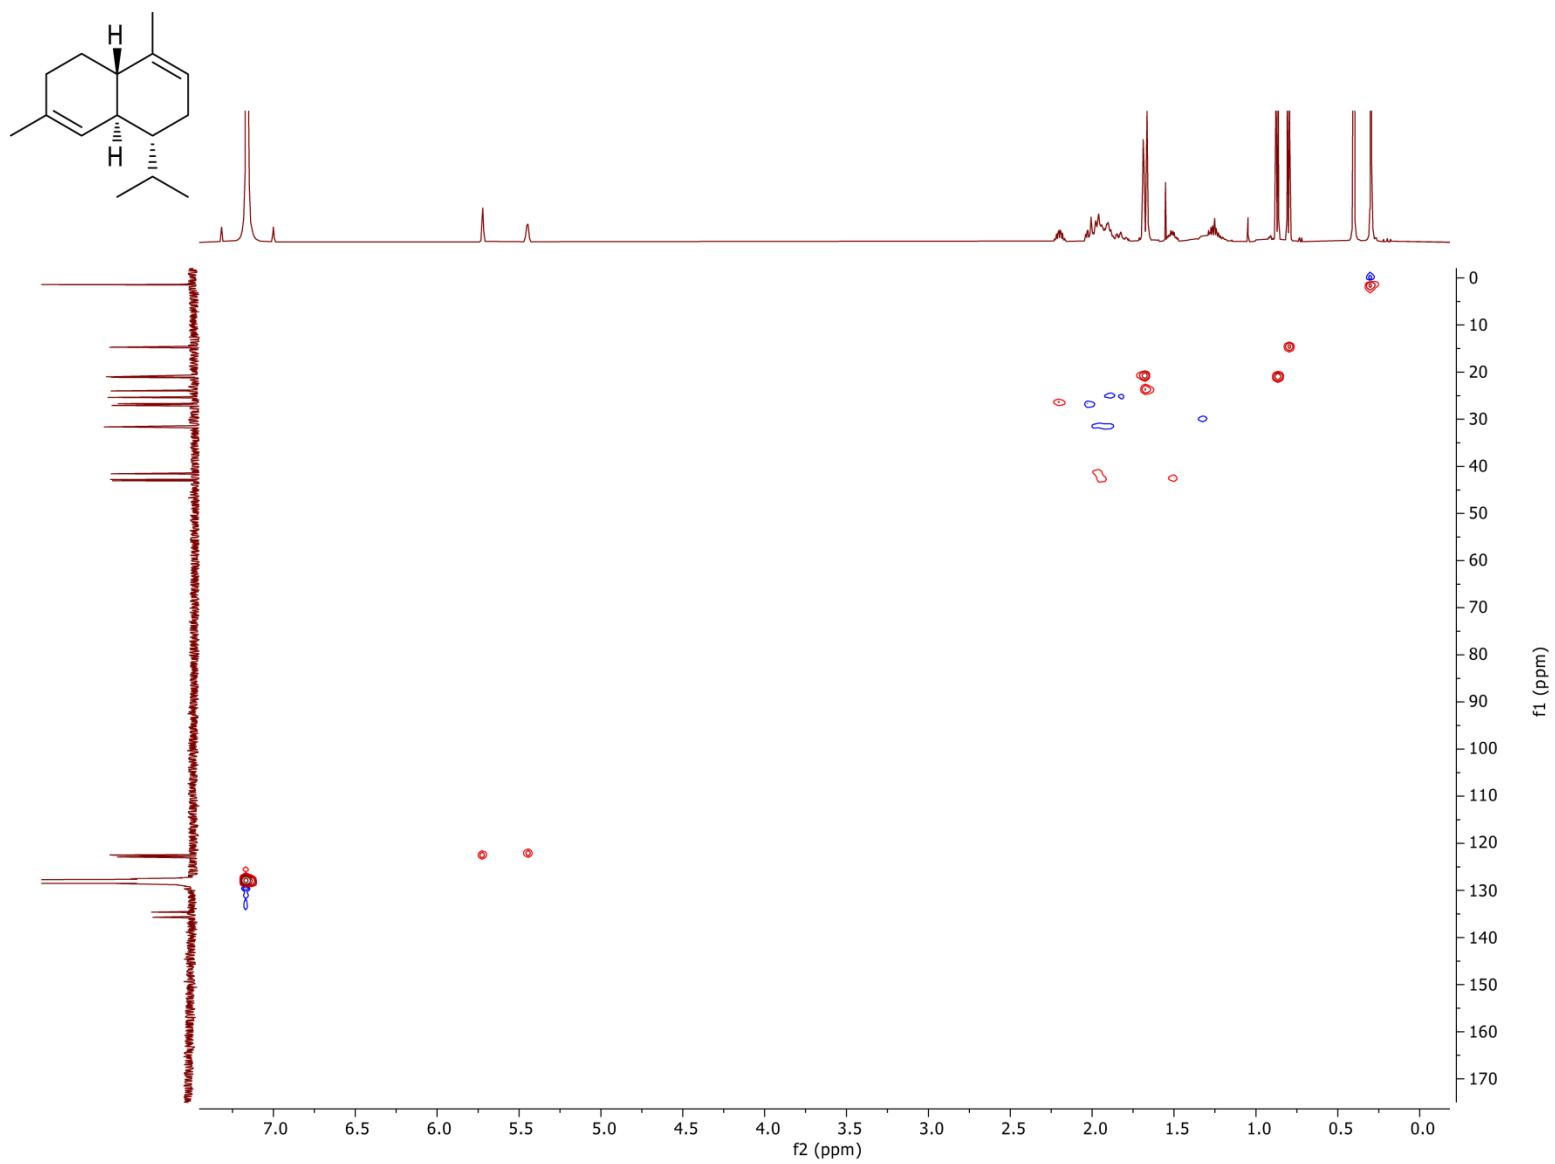

**Figure S18.** HSQC spectrum ( $C_6D_6$ ) of **11**.



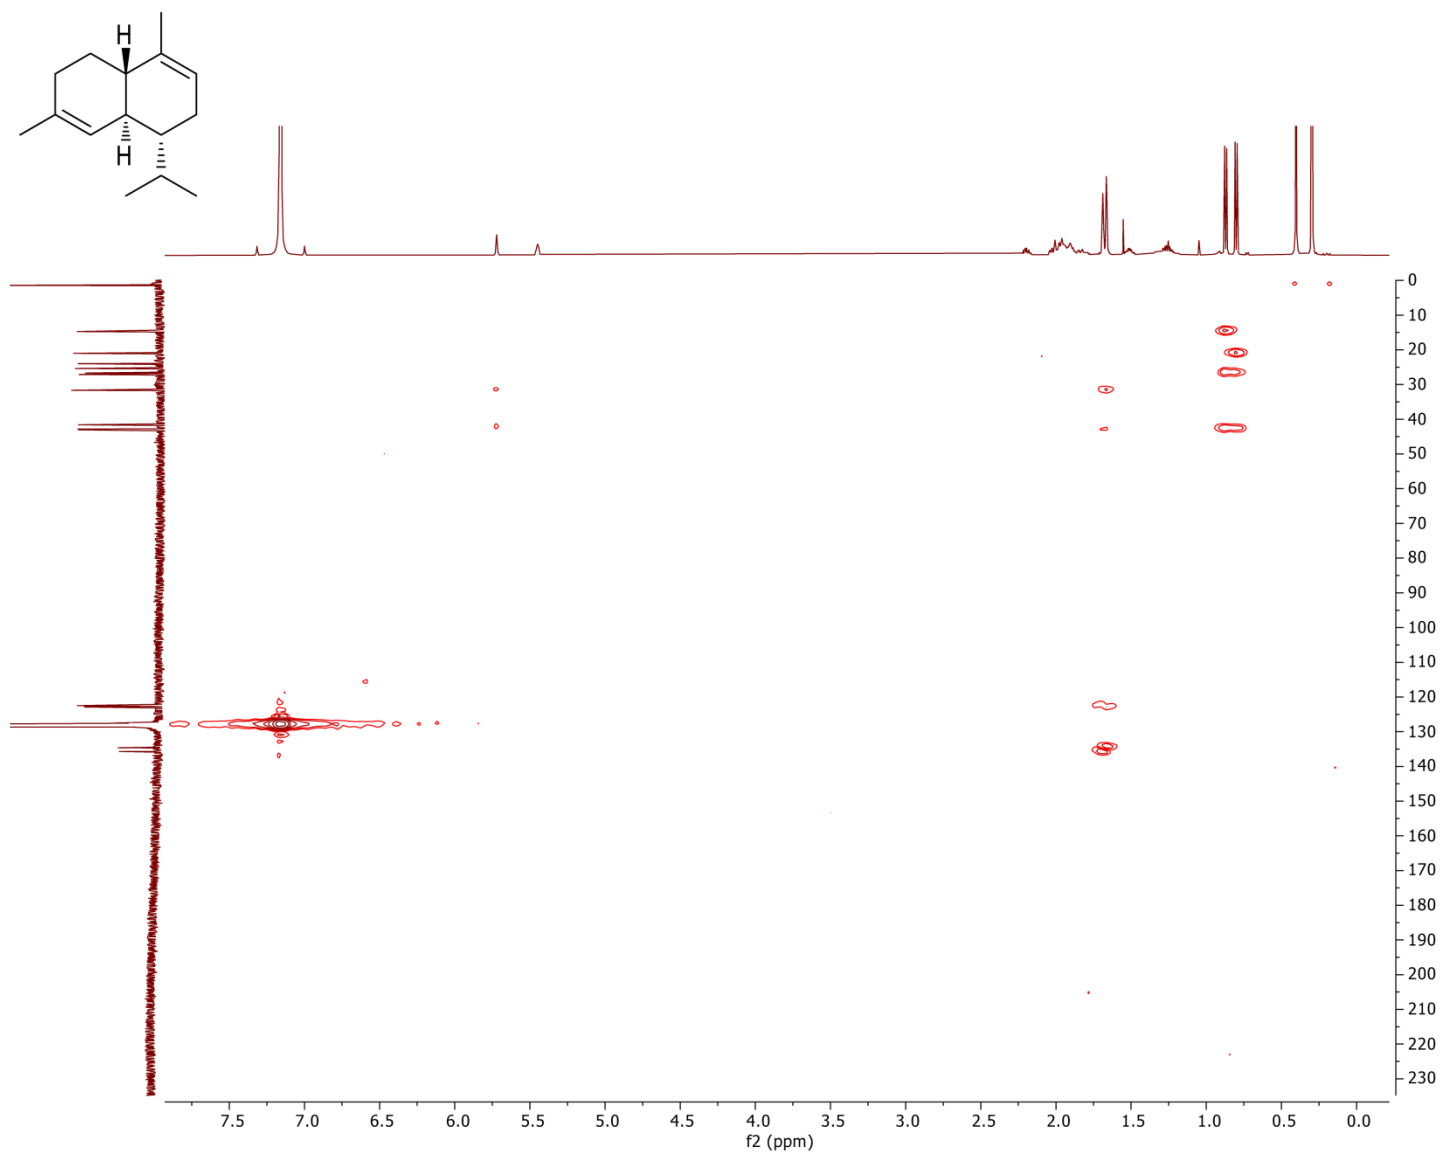

**Figure S19.** HMBC spectrum (C<sub>6</sub>D<sub>6</sub>) of **11**.

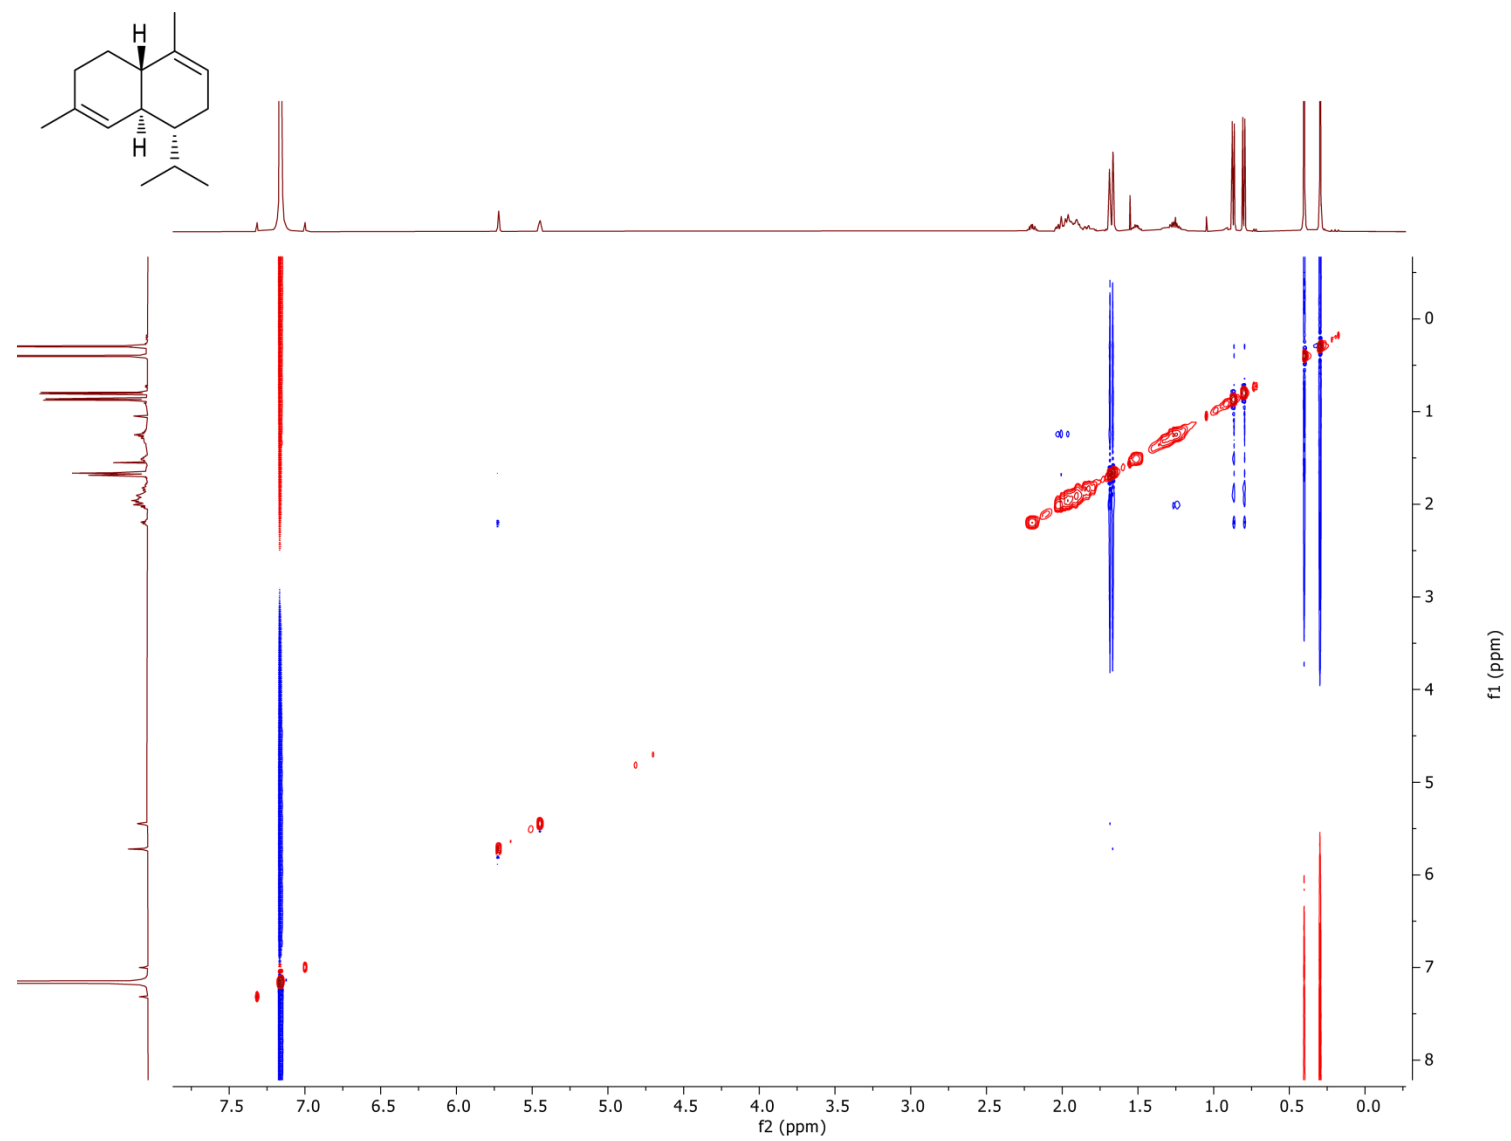

Figure S20. NOESY spectrum (C<sub>6</sub>D<sub>6</sub>) of 11.

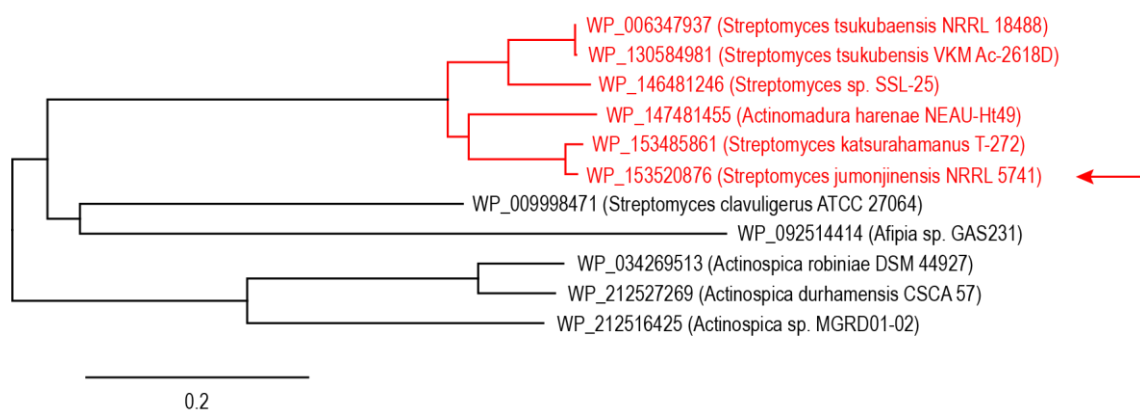

**Figure S21.** Detailed section of the phylogenetic tree shown in Figure 2 of main text. The red arrow indicates the characterised  $\alpha$ -cadinene synthase (SjaCS). The closely related enzymes shown in red share a pairwise identity of 83% and may have the same function.

MTQLNSFSVPDFHLPFGNSKHPLAARANAEAATWAVRHELVTDAVDQFAGIGFGHLAGRVSG  
DVPYETVLLAEWMAWSFVLDDQHDHLIRTGEVAAWRPVAEAI TEHLATGSAGGSGARRNPL  
VKGFVDVCDRI LDGMPEGPAARYRAHVPLMLDSL DQEAGNRGGEGRPTVRDYILMRHSSQI  
LPMDMVEAGLGLDVPQRI HDLPEFKALVASALDVISWGNDFVSLPKEHSCGDNNNLVSLIS  
SWEGCSLATAVRAVEGRIQDRIEEYLAGERLLTETLDARGETDPQVRAAVSRIVRSYEDWII  
GADLWQRYECTRYSDERFAAGLESAYTRPGLVSV A

**Figure S22.** Amino acid sequence of SIADS (WP\_078950427). Highly conserved residues are highlighted in yellow.

MTQLNSFSVPDFHLPFGNSKHPLAARANADATSWAVRHELVTDAVEQFAGIGFGHLAGRVSG  
EVPYETVALLAEWMAWSFVLDDQHDHLIRTGELEAWRPVVGAI TEHLETGGTPEAPGTPDTQ  
GARRARQTQGARAAQGAGARRNPLVSGFVDVCDRI LAGMSEGTAARYRAHVPLMLHSLDQEA  
GNRGTVGRPSVDEYIILMRHSSQMLPMDMVEAGLGLDLPQRI HDLPEFKALIASAVDVISW  
GNDFVSLPKEYSCGDNNNLVSLIASWEGCSLADGVRAVENRIQARIEDFLTGERLLFETLDA  
RGETDGAIRADVARCVRSYEDWII GADLWQRYECTRYSDERFAAGLESAYTRPDLVWVA

**Figure S23.** Amino acid sequence of SsADS (WP\_150516140). Highly conserved residues are highlighted in yellow.

**Amorpha-4,11-diene (12).** This compound was isolated by silica gel column chromatography with pentane. Yield: 1 mg, 4.9  $\mu\text{mol}$ , 2.6%, from 80 mg (185  $\mu\text{mol}$ ) FPP triammonium salt. TLC (pentane):  $R_f = 0.69$ . GC (HP-5MS):  $I = 1480$ . Optical rotary power:  $[\alpha]_D^{25} = -9.4$  (c 0.64,  $\text{CH}_2\text{Cl}_2$ ). The EI mass spectrum is shown in Figure 4B of main text and NMR data are given in Table S4.

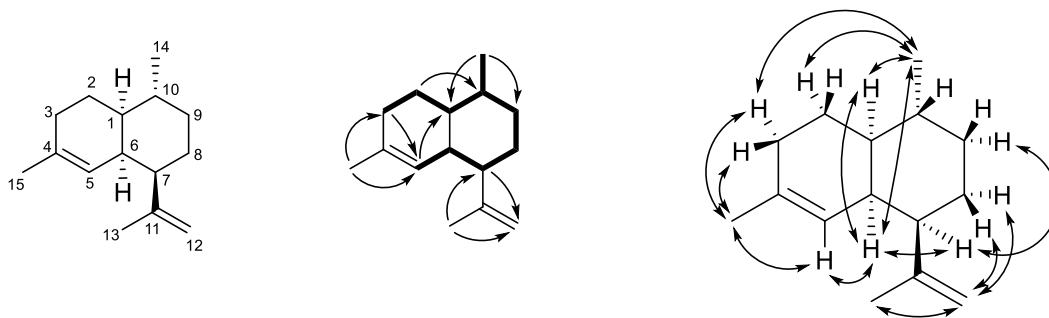

**Figure S24.** Structure elucidation of amorpho-4,11-diene (**12**). Bold:  $^1\text{H},^1\text{H}$ -COSY, single headed arrows: key HMBC, and double headed arrows: NOESY correlations.

**Table S4.** NMR data of **12** in  $\text{C}_6\text{D}_6$  recorded at 298 K.

| <b>12</b>        |                 |                       |                                                              |
|------------------|-----------------|-----------------------|--------------------------------------------------------------|
| $\text{C}^{[a]}$ | type            | $^{13}\text{C}^{[b]}$ | $^1\text{H}^{[b]}$                                           |
| 1                | CH              | 42.11                 | 1.18 (m)                                                     |
| 2                | CH <sub>2</sub> | 26.17                 | 1.89 (m, H <sub>α</sub> )<br>1.51 (m, H <sub>β</sub> )       |
| 3                | CH <sub>2</sub> | 26.75                 | 1.82 (m)<br>1.69 (m)                                         |
| 4                | C               | 134.61                | –                                                            |
| 5                | CH              | 121.40                | 5.33 (br s)                                                  |
| 6                | CH              | 38.03                 | 2.57 (m)                                                     |
| 7                | CH              | 47.97                 | 1.92 (m)                                                     |
| 8                | CH <sub>2</sub> | 26.50                 | 1.55 (m)<br>1.36 (m)                                         |
| 9                | CH <sub>2</sub> | 35.77                 | 1.63 (m, H <sub>β</sub> )<br>0.93 (m, H <sub>α</sub> )       |
| 10               | CH              | 28.20                 | 1.41 (m)                                                     |
| 11               | C               | 147.93                | –                                                            |
| 12               | CH <sub>2</sub> | 110.39                | 4.99 (br s, H <sub>E</sub> )<br>4.81 (br s, H <sub>Z</sub> ) |
| 13               | CH <sub>3</sub> | 22.72                 | 1.72 (s)                                                     |
| 14               | CH <sub>3</sub> | 20.10                 | 0.87 (d, $J = 6.5$ )                                         |
| 15               | CH <sub>3</sub> | 23.86                 | 1.61 (s)                                                     |

[a] Carbon numbering as shown in Figure S24. [b] Chemical shifts  $\delta$  in ppm; multiplicity: s = singlet, d = doublet, m = multiplet, br = broad; coupling constants  $J$  are given in Hertz.

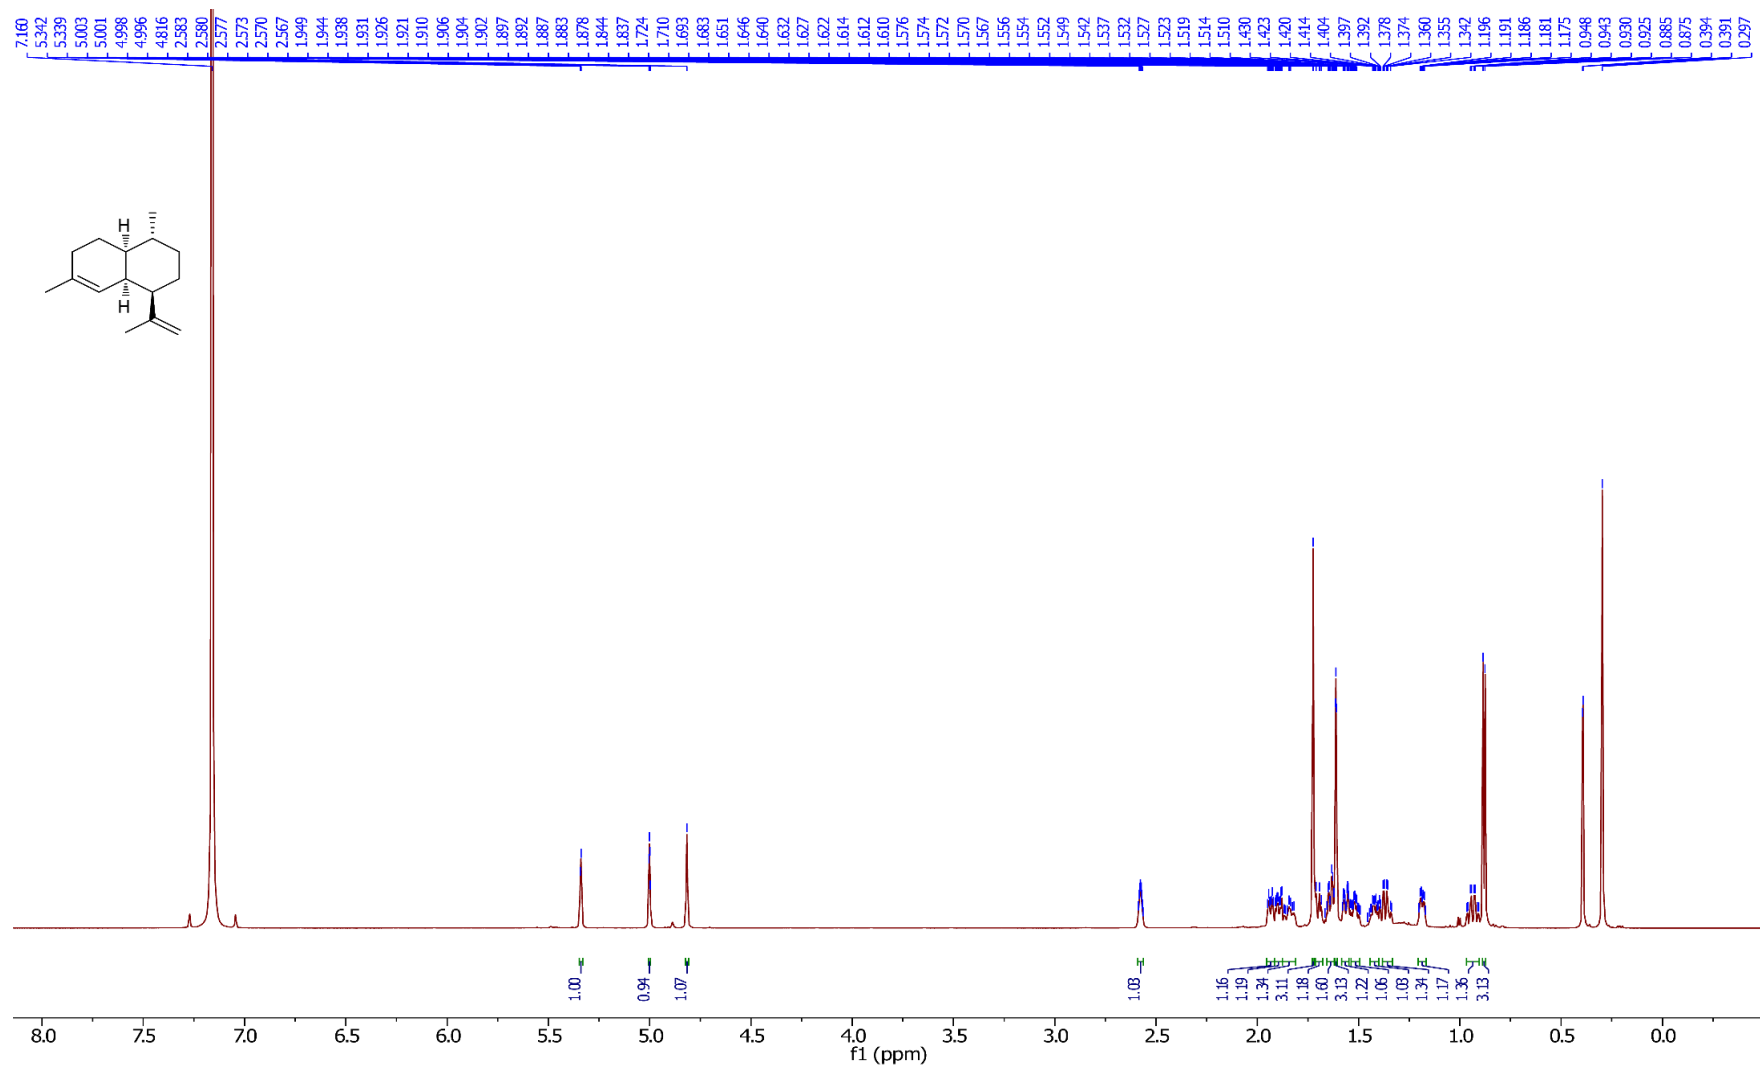

Figure S25. <sup>1</sup>H NMR spectrum of 12 (700 MHz, C<sub>6</sub>D<sub>6</sub>).

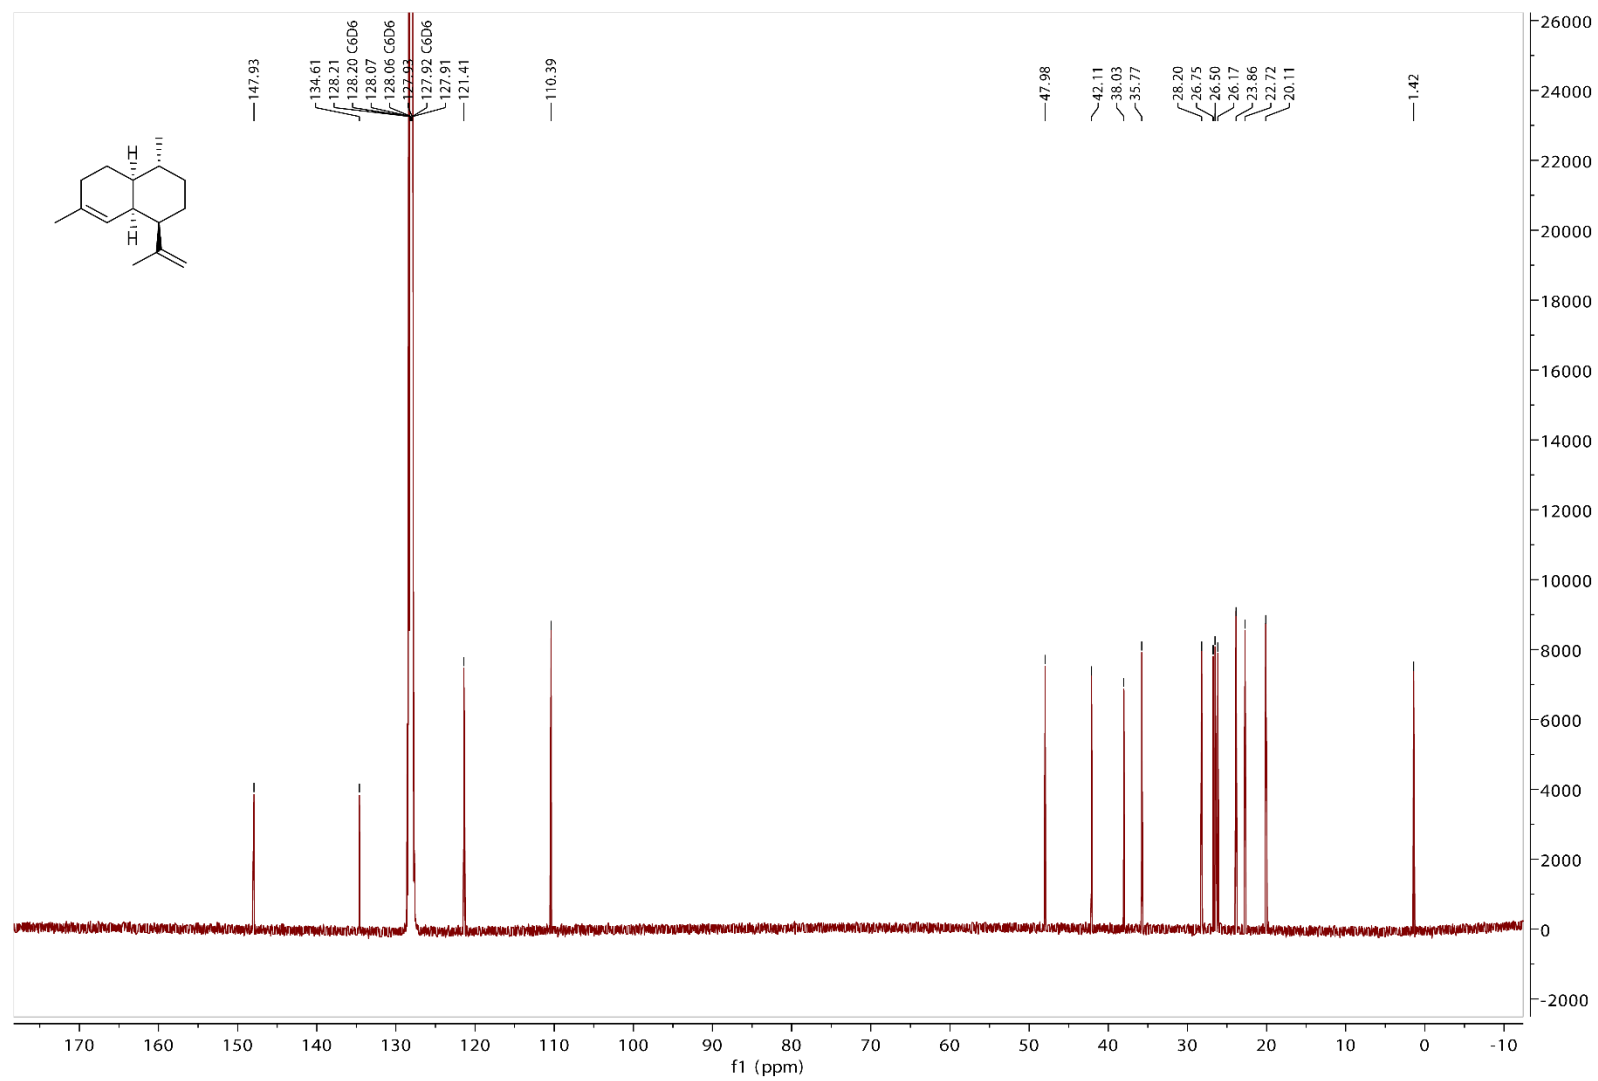

**Figure S26.**  $^{13}\text{C}$  NMR spectrum of **12** (176 MHz,  $\text{C}_6\text{D}_6$ ).

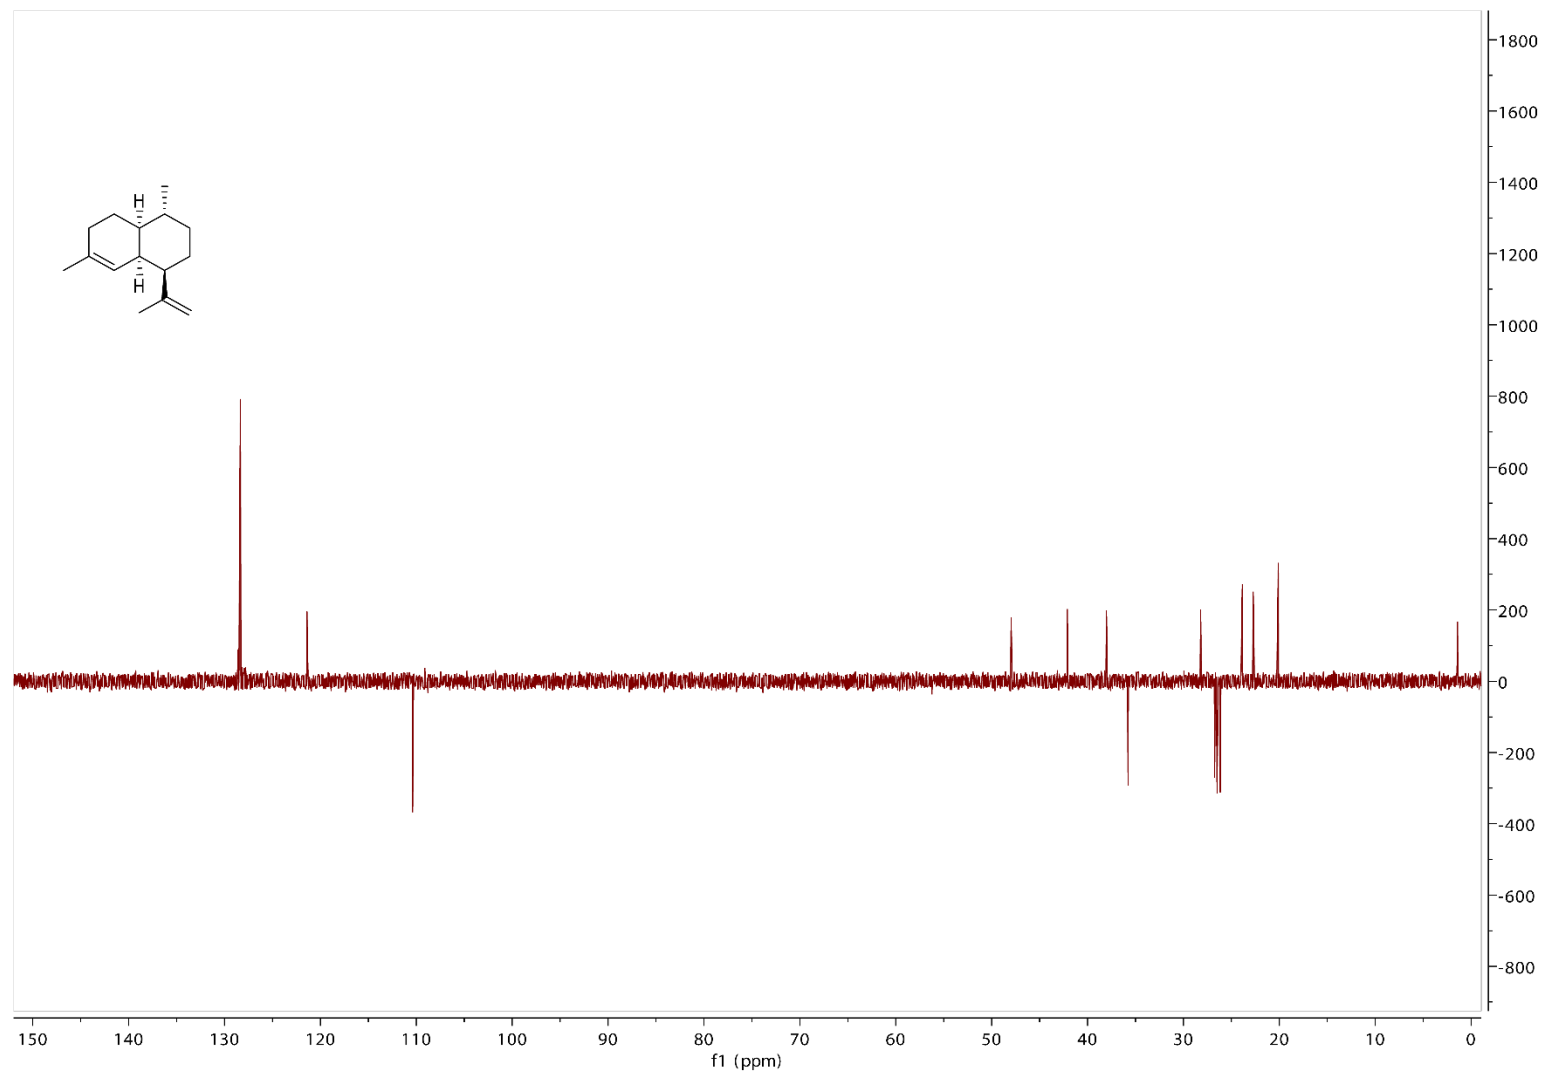

**Figure S27.**  $^{13}\text{C}$ -DEPT135 spectrum of **12** (176 MHz,  $\text{C}_6\text{D}_6$ ).



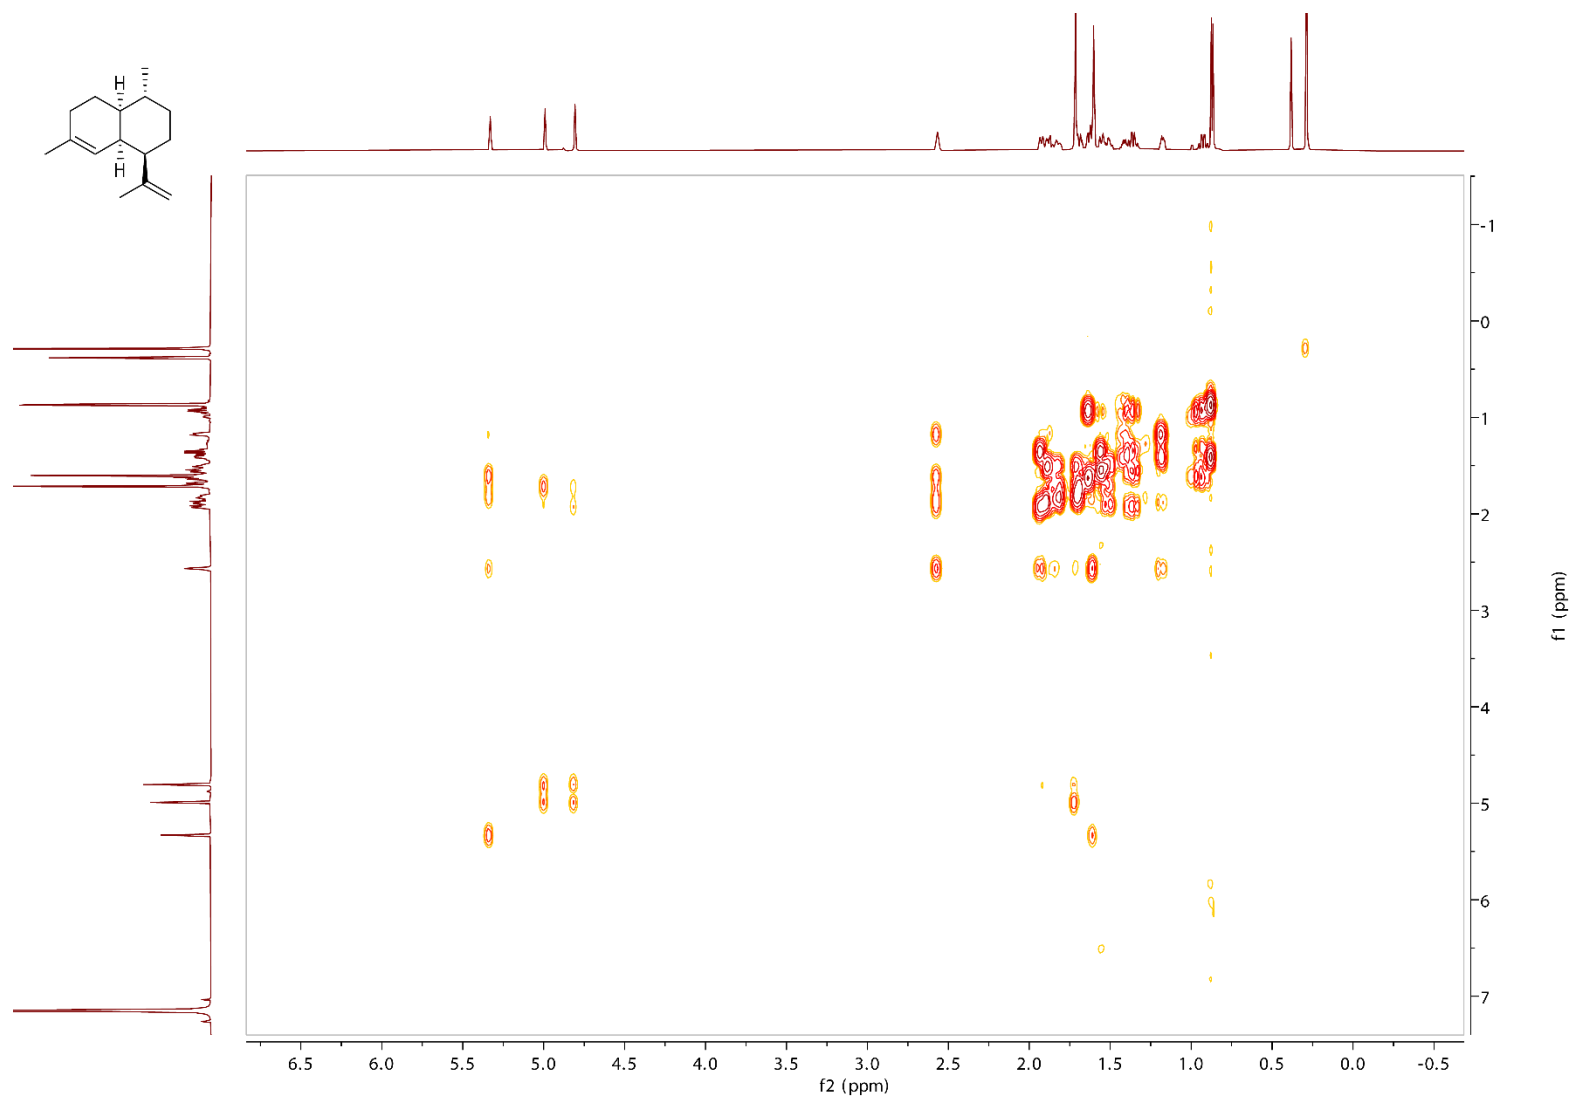

**Figure S28.**  $^1\text{H}$ ,  $^1\text{H}$ -COSY spectrum ( $\text{C}_6\text{D}_6$ ) of **12**.

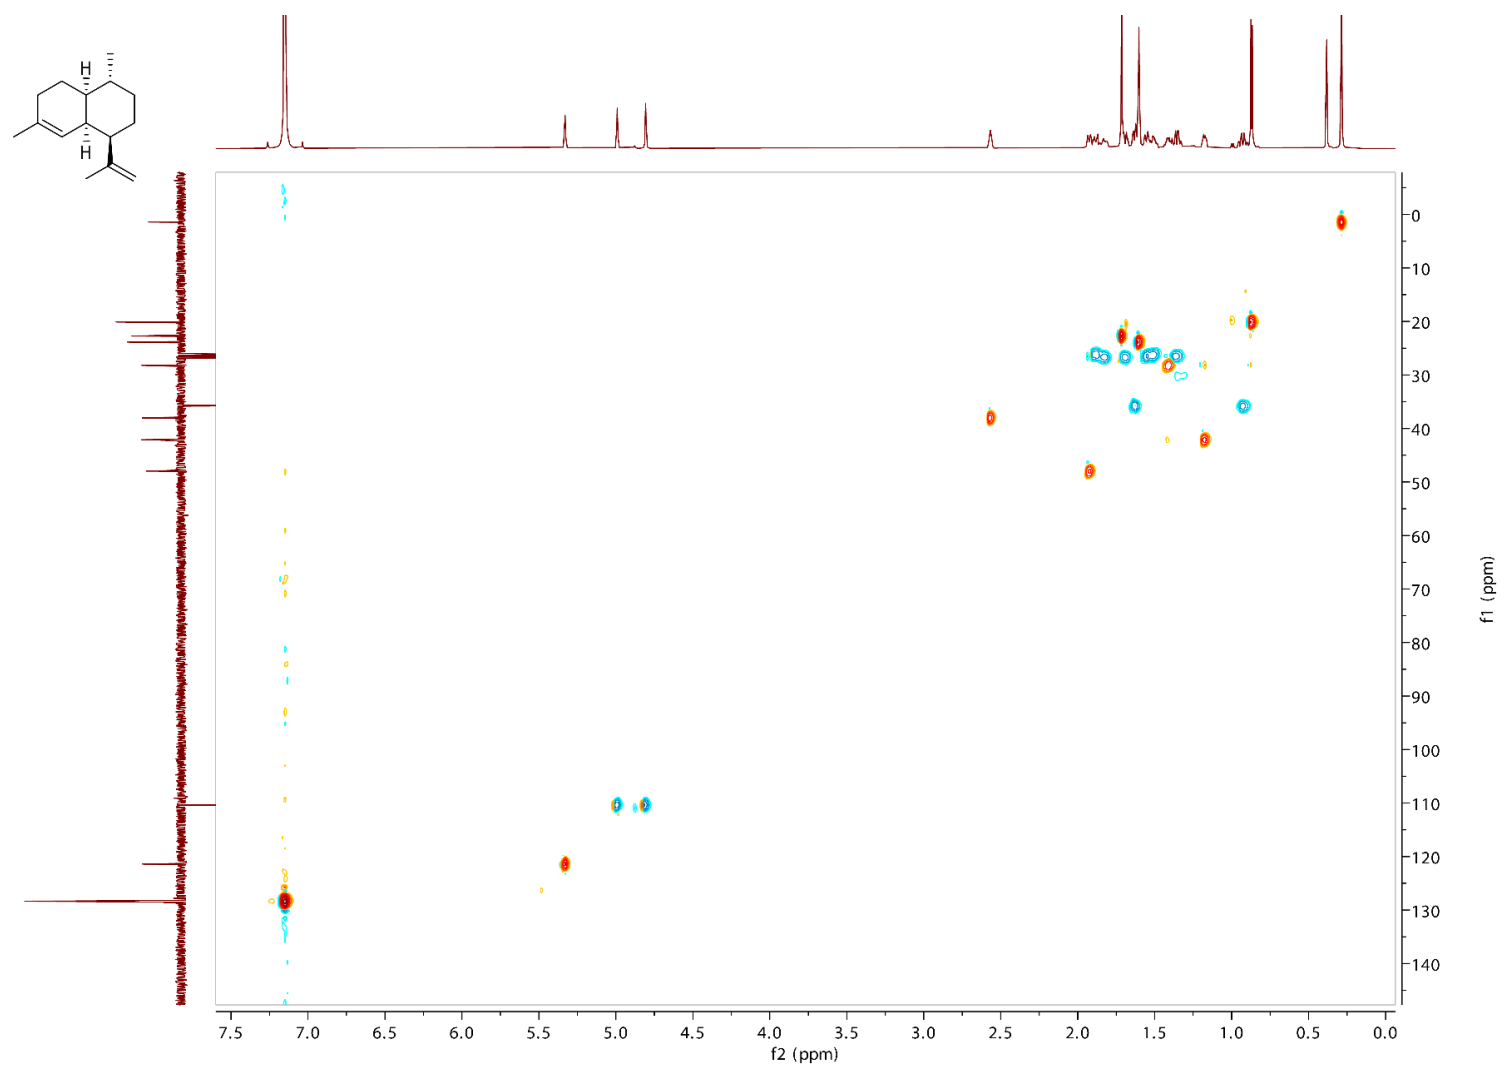

Figure S29. HSQC spectrum (C<sub>6</sub>D<sub>6</sub>) of 12.

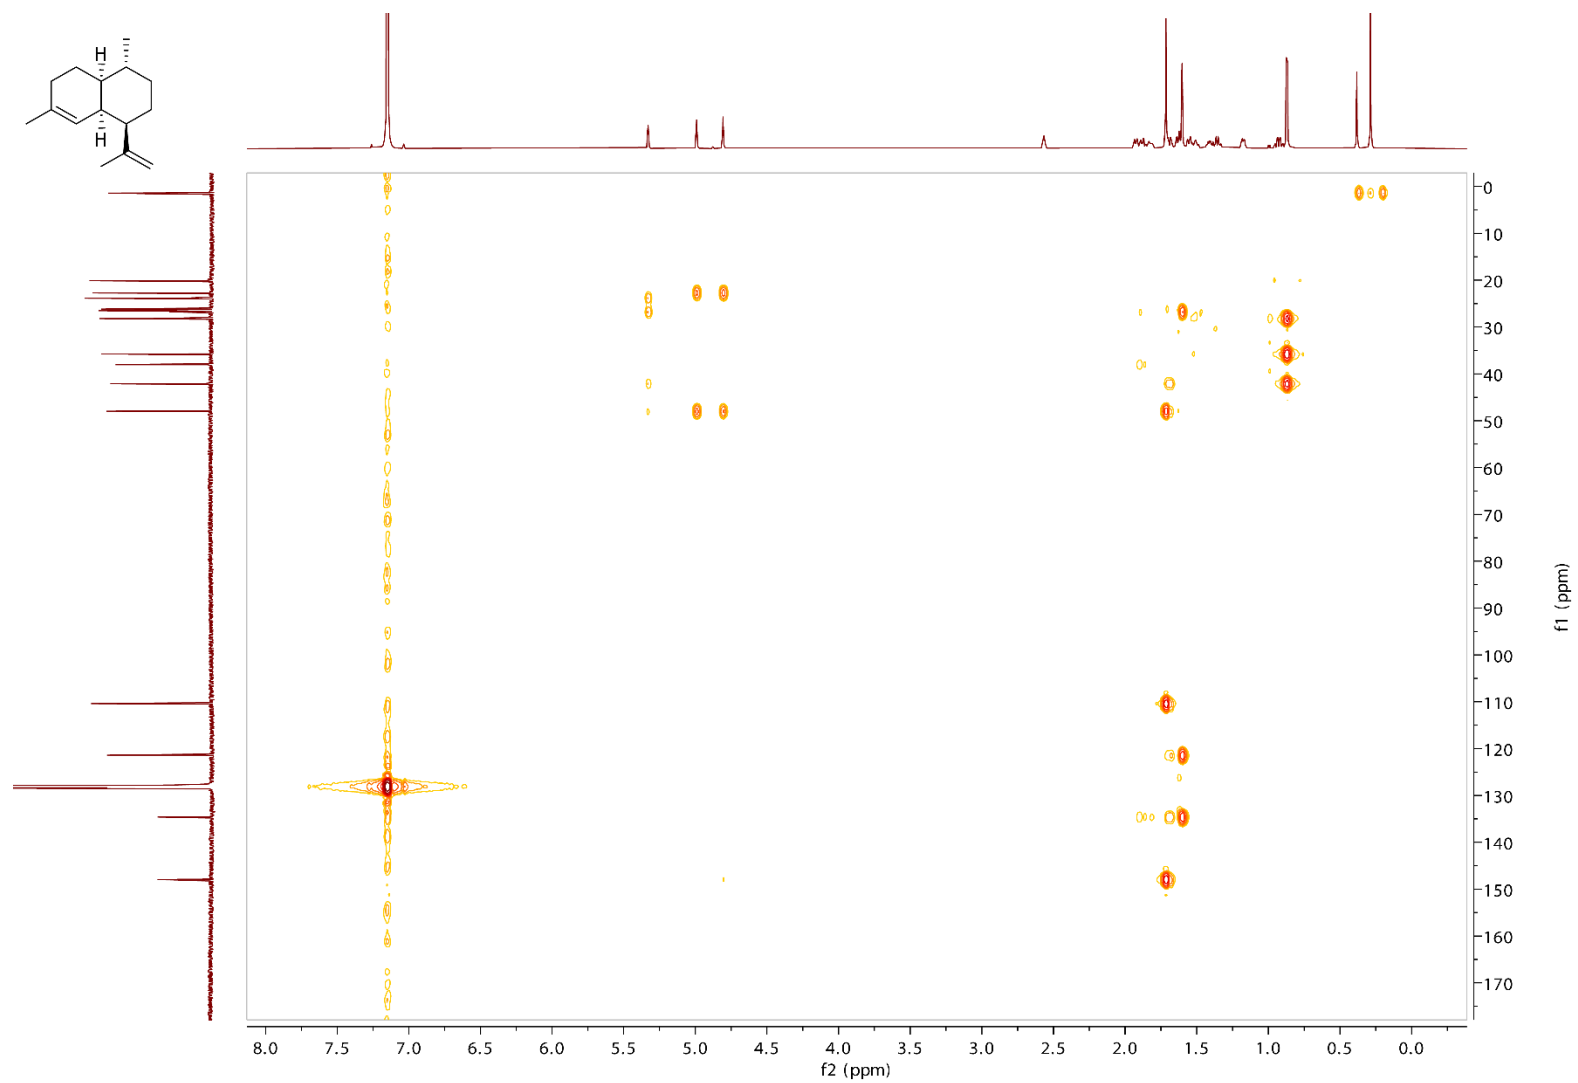

Figure S30. HMBC spectrum ( $\text{C}_6\text{D}_6$ ) of 12.

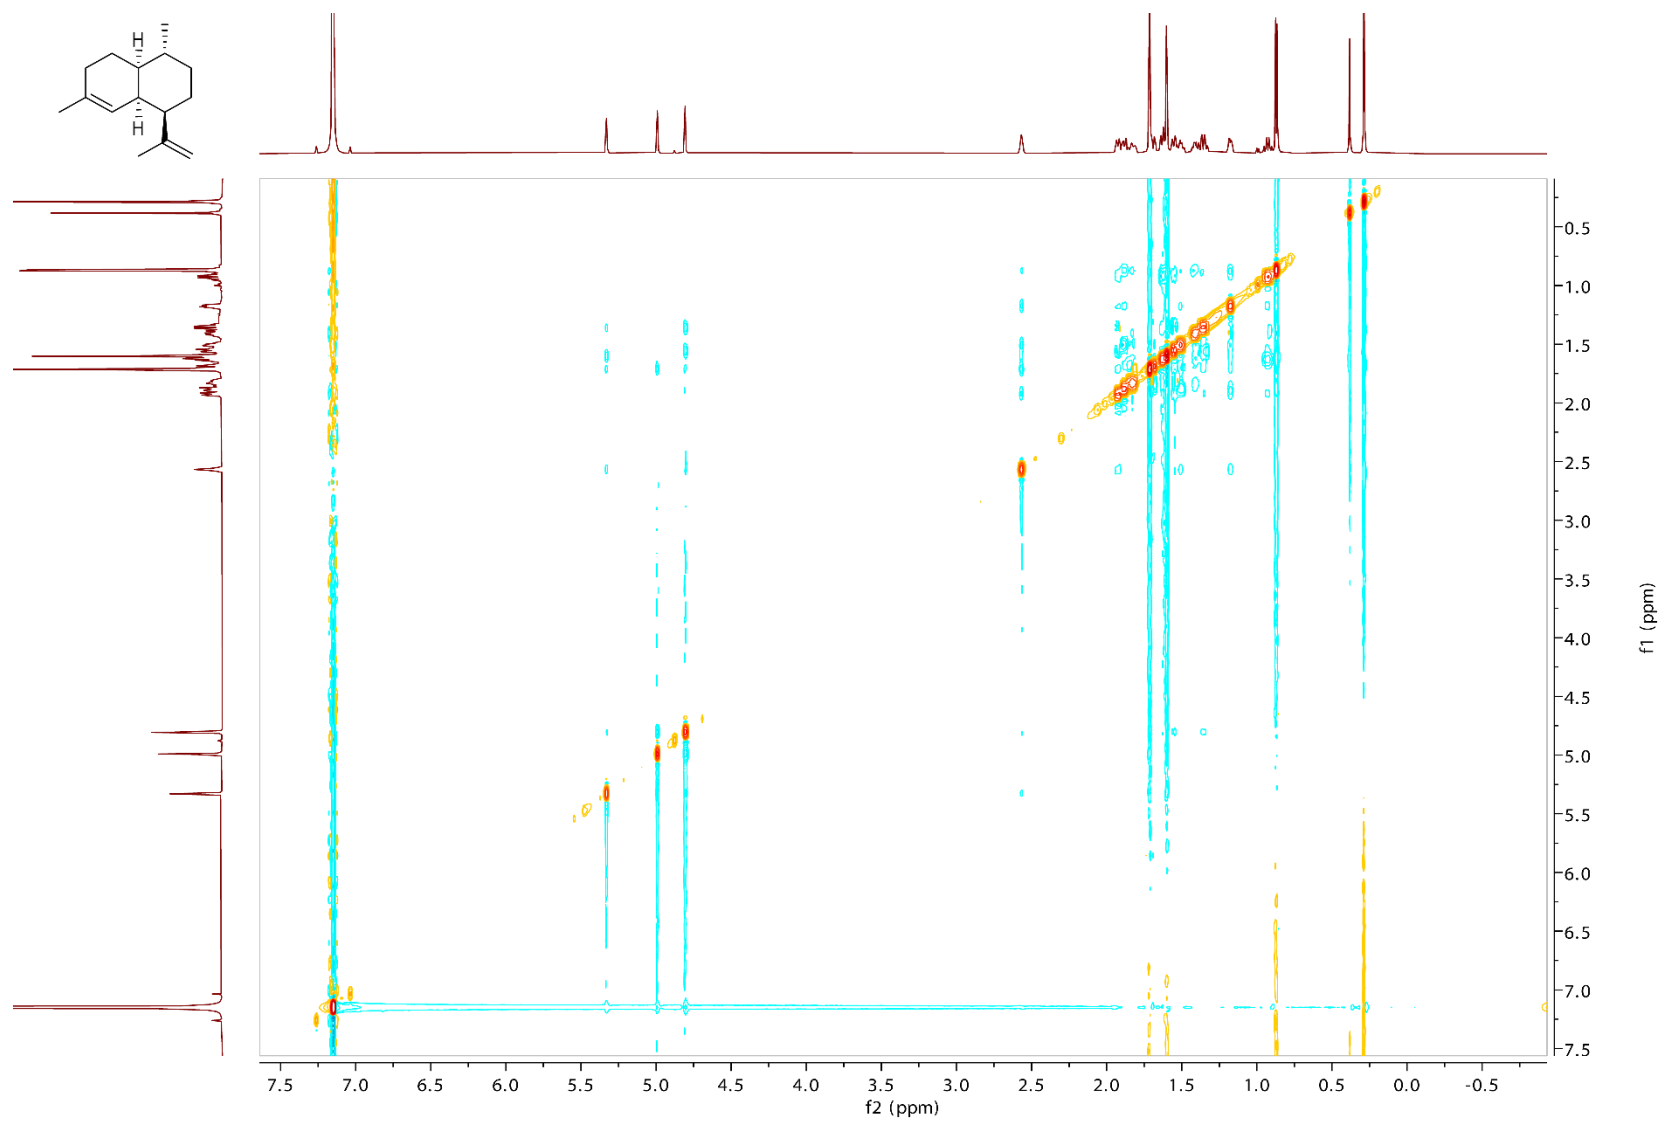

**Figure S31.** NOESY spectrum ( $C_6D_6$ ) of **12**.

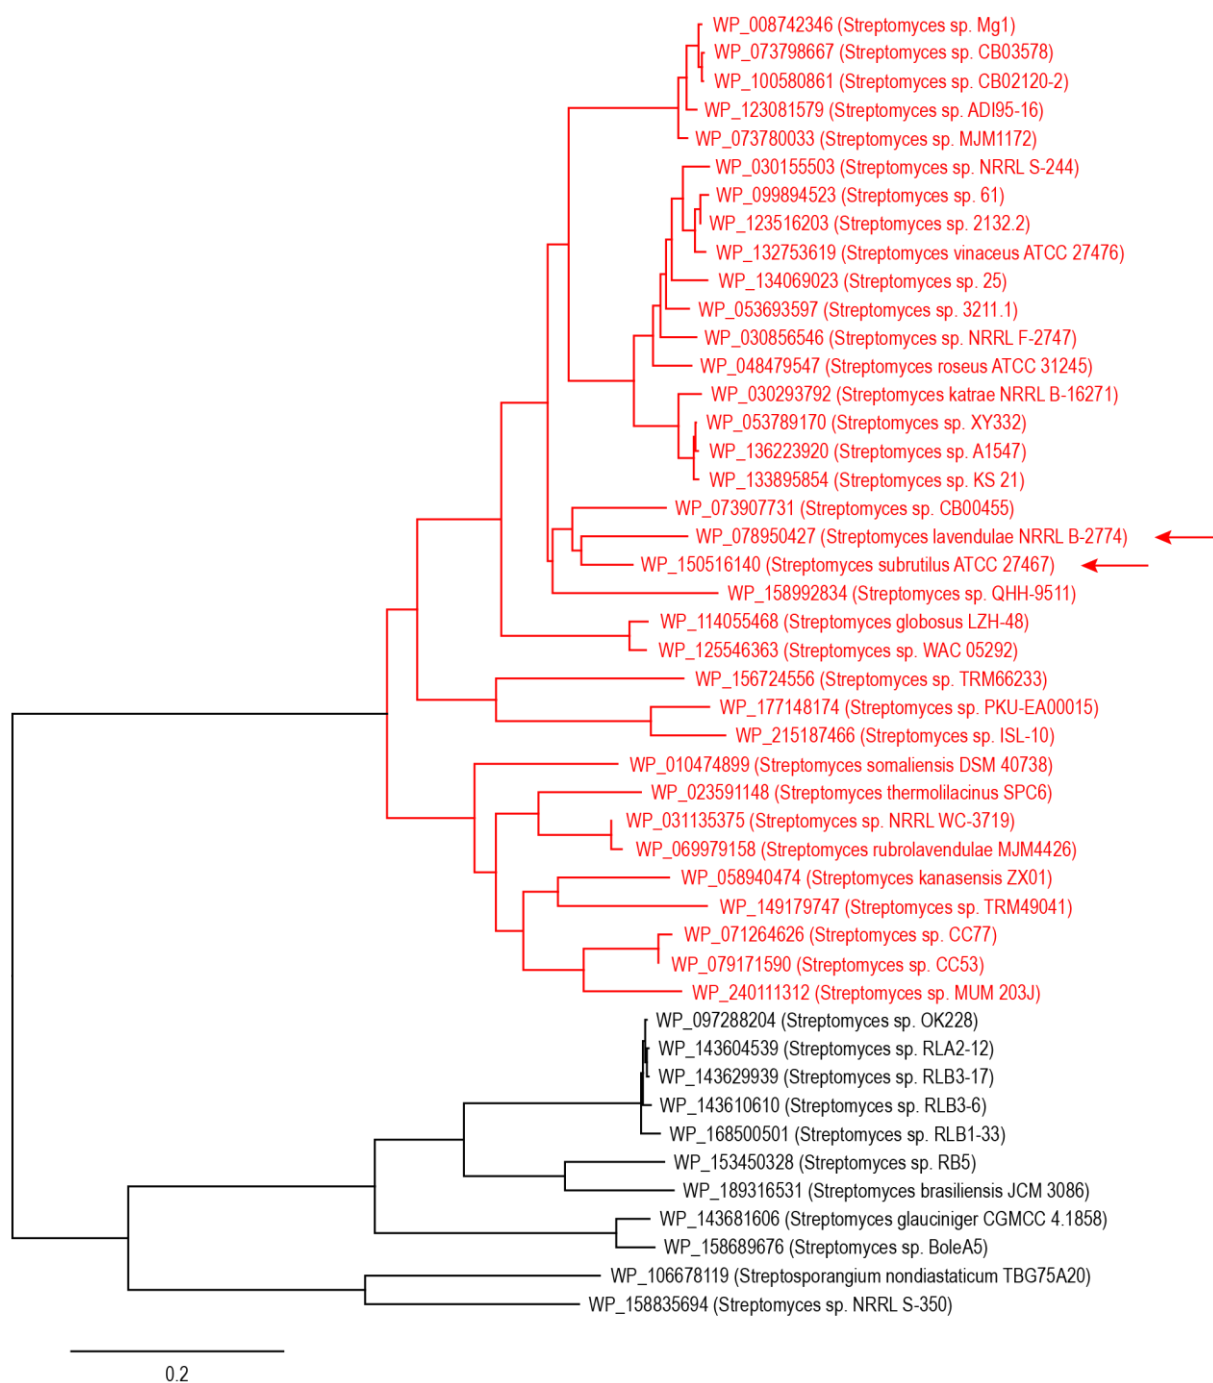

**Figure S32.** Detailed section of the phylogenetic tree shown in Figure 2 of main text. The red arrow indicates the characterised amorphadiene synthases (SIADS and SsADS). The closely related enzymes shown in red share a pairwise identity of 70% and may have the same function.

MTAVFERRHLPRIEMPFPRNRHRQQDLAQWHTRCWTVAHTLMKPDRATAYFDDLRYTDLIGG  
YYVGAPLPVLNTINDFSLWFFVWDDRHNLDVFNRRQEGWSRLRDGLHAALDTPHRHINDPDP  
LISAFCDVVRFFEPFSDDWNARFITHFHSTIDAYDQEYRNRTTDSVPTVGDYLLRRHTFG  
MWWIDLLELAAGYELPSCVYSSSPYREAGLASQEFSAWYNDLHSMPELAAGDFHNLGIVL  
AHHEGLTVHEAAGEVARRIEQRIVNYRDHEGDVGQLDDIGADPGLRAGVDRCLFNMRNWS  
SVYYFHDESSRYQLESWEDPARPLYVEEGREQ

**Figure S33.** Amino acid sequence of NbEIZS (WP\_086008896). Highly conserved residues are highlighted in yellow. Sequence deviations within the conserved motifs are highlighted in green.

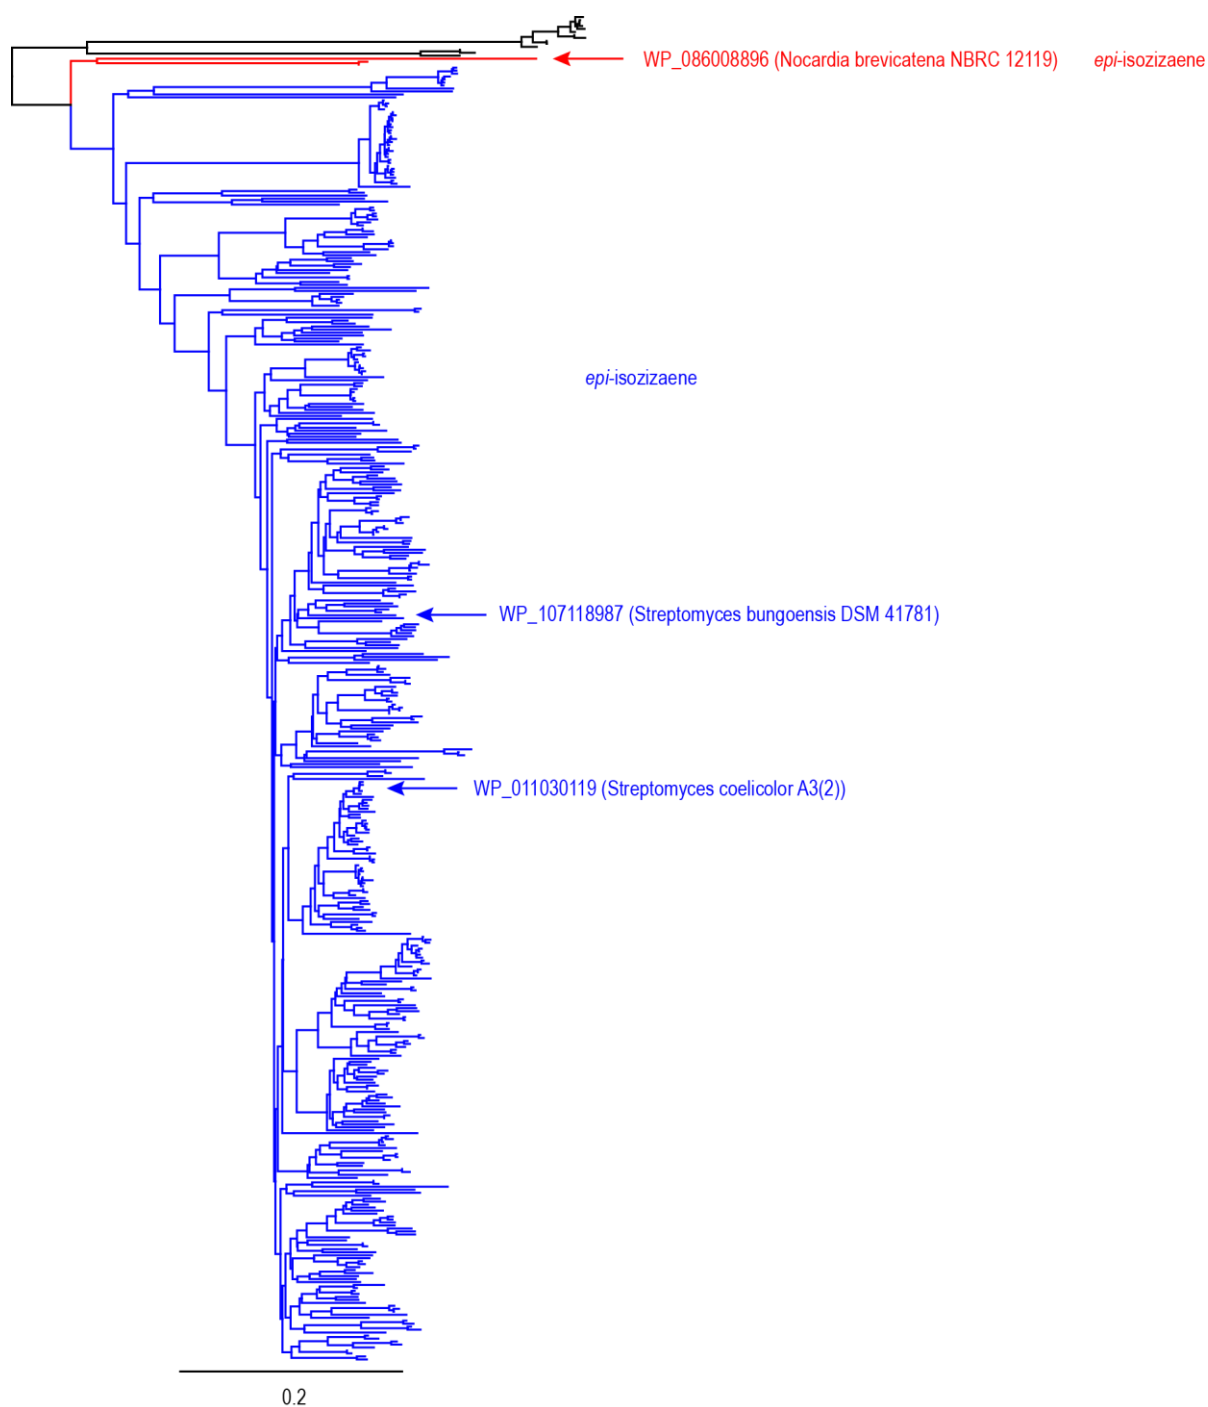

**Figure S34.** Detailed section of the phylogenetic tree shown in Figure 2 of main text. The blue arrows indicate the previously characterised *epi-isozizaene* synthases from *S. coelicolor* and *S. bungoensis*, and the red arrow highlights the *epi-isozizaene* synthase with a monoterpene synthase side activity from *N. brevicatena* (NbEIZS) characterised in this study.

**Table S5.** Identification of monoterpenes obtained with NbEIZS.

| compound                                   | $f^a$ | $f^a$ (lit.) | match <sup>b</sup> | reference |
|--------------------------------------------|-------|--------------|--------------------|-----------|
| myrcene ( <b>14</b> )                      | 990   | 988          | 945                | [6]       |
| sylvestrene ( <b>15</b> )                  | 1029  | 1025         | 913                | [6]       |
| $\gamma$ -terpinene ( <b>16</b> )          | 1059  | 1054         | 905                | [6]       |
| <i>cis</i> -sabinene hydrate ( <b>17</b> ) | 1067  | 1065         | 886                | [6]       |
| terpinolene ( <b>18</b> )                  | 1088  | 1088         | 928                | [7]       |
| linalool ( <b>19</b> )                     | 1099  | 1095         | 923                | [6]       |
| <i>cis-p</i> -ment-2-en-1-ol ( <b>20</b> ) | 1122  | 1118         | 889                | [6]       |
| terpinen-4-ol ( <b>21</b> )                | 1177  | 1174         | 896                | [6]       |
| $\alpha$ -terpineol ( <b>22</b> )          | 1189  | 1186         | 893                | [6]       |

<sup>a</sup>Retention index on a HP5-MS or (for the literature data) comparable GC column.

<sup>b</sup>Match factor of measured and data base mass spectrum (999 = identical mass spectra).



MPQDVRFDLPFTTPVSAHLEYAREQHRLRWVRDMGLVRSQAGFEEYQSWDLPQAAIRTYPHAS  
PDDMVVLMNWFSLAFLEDDQFDAASPDRADRVTEVARELIVTPLRPAGTRPRVICPITLAWA  
EVWEQLSDGMSLTWCTRFAASWGRFLAAHAEVDLAARGTLLGVGPYTAFRRTVGIHHSID  
AGERSRRFEVPAQAQAHVMEGLRDAAADTIGFMNDIHSFEREKRRGDGHNLIAVLHREGRY  
SWEKAAAEAFRMTVESLDTYVRLEARVPAMCGELGLDADGRDRVWVGVEAIRHWISGNYEWA  
LTTGRYAAAKKGPAAAAELAGRGCLDDLLTV

**Figure S35.** Amino acid sequence of SfES (WP\_028812116). Highly conserved residues are highlighted in yellow.

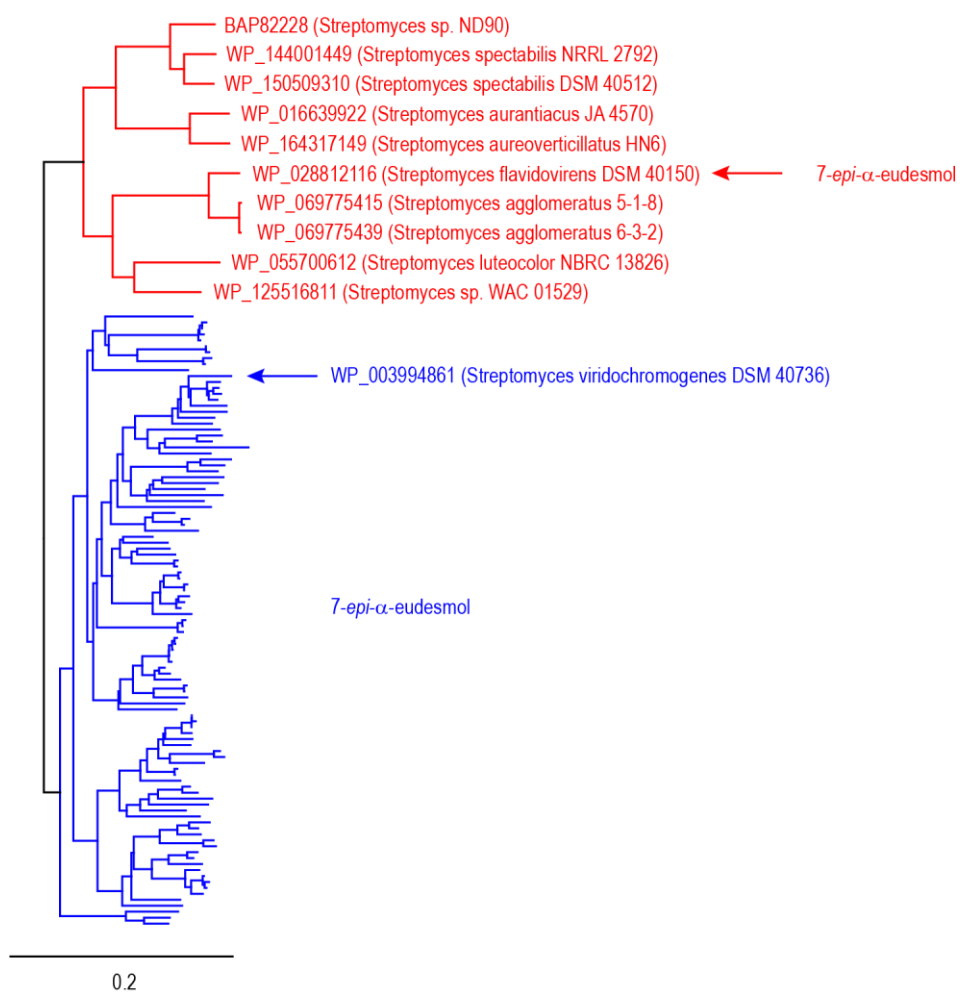

**Figure S36.** Detailed section of the phylogenetic tree shown in Figure 2 of main text. The blue arrows indicate the previously characterised 7-*epi*- $\alpha$ -eudesmol synthase from *S. viridochromogenes*, and the red arrow highlights the newly characterised 7-*epi*- $\alpha$ -eudesmol synthase from *S. flavidovirens* (SfES).

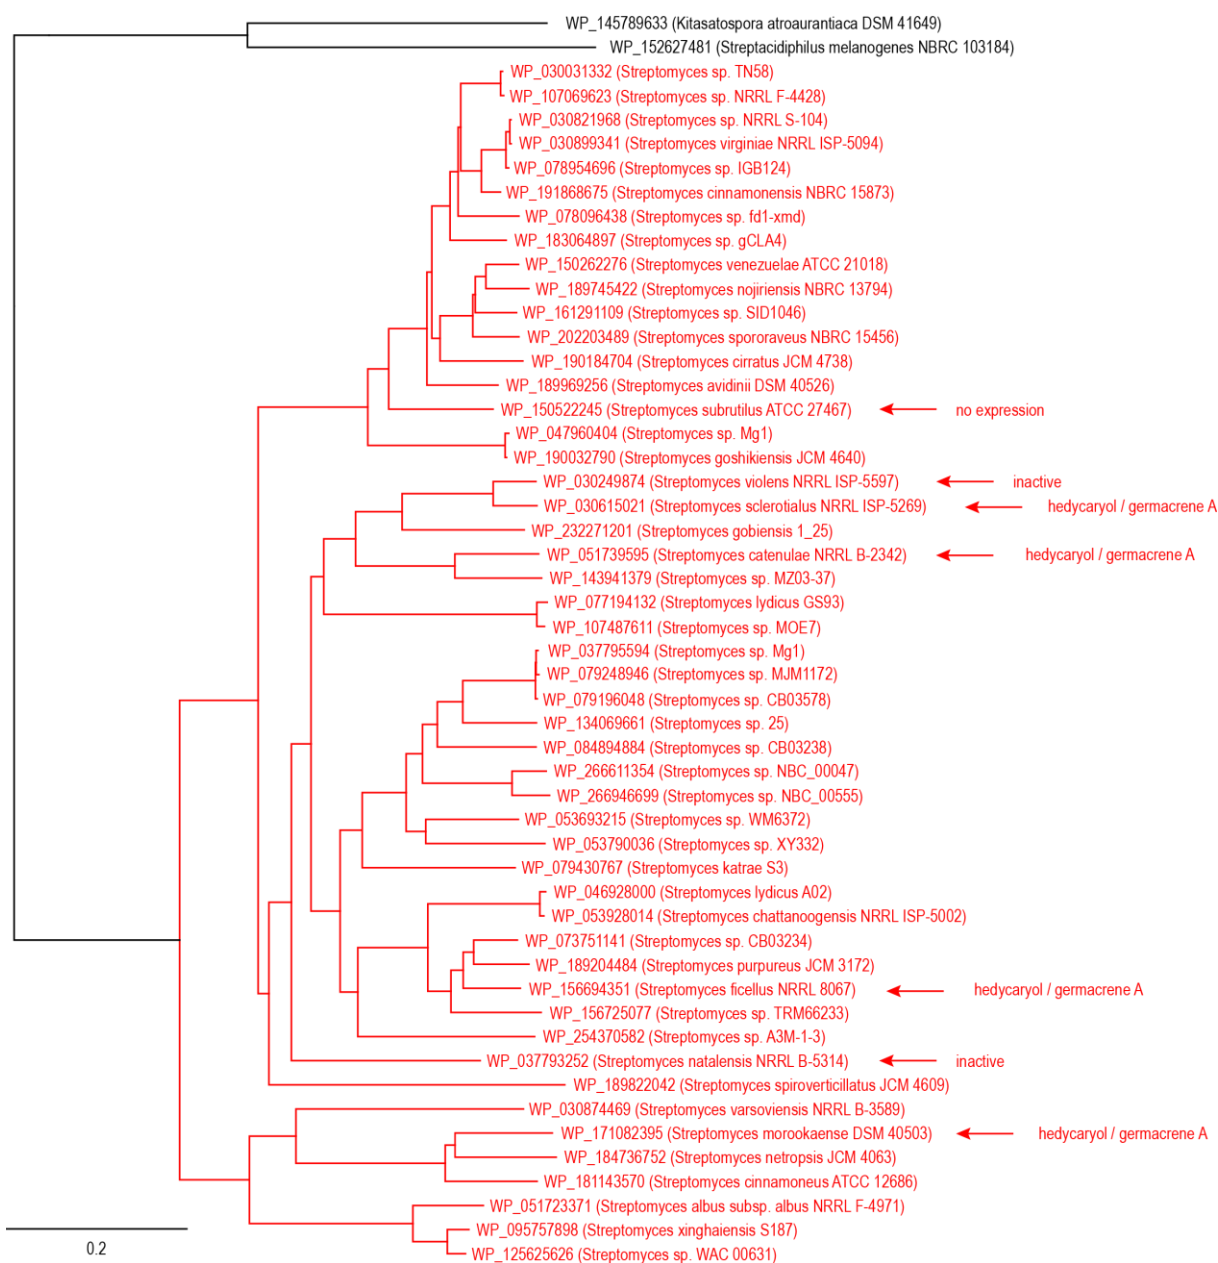

**Figure S37.** Detailed section of the phylogenetic tree shown in Figure 2 of main text. The red arrows highlight the newly characterised hedycaryol / germacrene A synthases from *S. sclerotialus* (SsHS), *S. catenulae* (SchS), *S. ficellus* (SfHS) and *S. morookaense* (SmGAS).

MATITDRGRPSAIGWRLPPFYCPVERRDLHAQADLLEKRAVEWIDAYGLYPDHTERAWGLA  
THSAEFTCRIIPRGAEDAMLLFIQWNYWANAVDDWHD SGSDATGTAKIVDHSARLIRALEYP  
GSAMLPSNPLTRALEDLVTRTRALLTPYQLMRFMDGTRDWLFGAGWQTSNAERGIMP SLNDF  
AAMTVSTNGTRFTLAWCDAANAIDVPPDVLYSAPVQALTDAAGFVVSSDNDLFSYAKE DHLD  
QPEQNLINVIAHEKGITPLEAVPYAVGIRDRAMTLFLRLREQLGRDADPMLARYLES LGDYV  
SGCIIWQNDAPRYASPRNRNPLPVP GASYHV TYRDTPSDLATAPPAIP SITWWWDQLRD

**Figure S38.** Amino acid sequence of SsHS (WP\_030615021). Highly conserved residues are highlighted in yellow. Sequence deviations within the conserved motifs are highlighted in green.

MTVTPDVRTTPGGDRSRPSPIGWQLPPFYCPITLTGDIHPRHAELERRALEWIDSYGLYPDA  
TERAWGLATHSAEFSCRIIPHGEPEPLLI FMMWNYWAHAVDDWLD SG SNATATGKVVDTSIR  
LLRALEYPGSAMPPSPYTDALHDLVRRTRAALSPWQLRRFIDGIRDWLFASSWQTANAERG  
VMPSLNDF AAMAVSINGTRFSLTWGEVANGADLPPDVLCS PAVQALTDAAGFLVGTDNDLFS  
YAKE DHLEIPEQNLINVIAHERGCTPAEALPEAVGLRDRMTMTLYLRLRDQLAADGDPMMRRY  
LDTVGDYIAGCIVWQNNAPREASPRNRNPLPVP GSSFGITYRDTPSDPST DAPALPAIAWWW  
DQLTSPDAP

**Figure S39.** Amino acid sequence of ScHS (WP\_051739595). Highly conserved residues are highlighted in yellow. Sequence deviations within the conserved motifs are highlighted in green.

MPPSYAEDTPPSRIGWRLPPFYCPFDRDLLHPKAAELEERAVAWIDAYGLYPDATERAWGLA  
THSADFTSRIIPHGDVEPILLFIEWNYWANAVDDWQD SG SAATRTADITDHSARLVRTIEAP  
GSRLLP RGPLTEALDDLVS RTRAMLTPFQLRRFTEGTRDWLFGAGWQTANTERDVMP SLNEF  
AAMRASVNGTRFTLTWCDAANDIRLPADVLYSAPVQALTDAAGFIVSCDNDLFSYNKE DHQE  
PREQNLLNVVARDRGCTPREALVPAVALRDRAMTLFVRLSEQLARDAGEPLRRYLDSL AHYV  
AGCITWQNRAPRYASPRNRNALPVEGASYDITWRDTPSDPSEPPPPVPAIAWWW RQLDG

**Figure S40.** Amino acid sequence of SfHS (WP\_156694351). Highly conserved residues are highlighted in yellow.

MTDTSTRPRPSAIGWRLPPFYCPIEPAVHPRAGQLEQRRAIAWLDSRGIFGNARDRAWSIATH  
STDFSCRIIPYGDDEPLLLFIEWNHWFALDDICHDTGSADIRTATIVDLNARIARCLEVPG  
SGMLGSSPFDAALEDLAARTRAMTTPVQLRRVTEGLRDWLFGAAWQVSNVERGVMPSLSDYV  
AMRPSINGTRFSLSWSEIAGGIRIPDHELYSAPVQALTEAAGFIVSCDNDLFSYAKEDSQET  
TDQNIIVNVLAHERRCPAEQALEEALVIRDRAMTLFLDLRAQIARNAGLHLRRYLEALGHYIS  
GCIRWMDAAPRYASPRNRYDLPVPGATYGITWRDSPRDTGTEPLPIASAAWWWEQLDAPVTA  
CAATA

**Figure S41.** Amino acid sequence of SmGAS (WP171082395). Highly conserved residues are highlighted in yellow.

MTDDQLLVELPPRYCPVQVDTHPDAELLEGGADWLTGYGLAGPRLRANDCAGFYGRIMPKA  
VTERLQMAVDWCFLMFAF **DDINCD**EVVPDAAGKQFVDIATRVRVLEVPDVNLGPTADLFLA  
PVRDLALRAHRFGTPTQVRRLVDGHRAYLGVLELWELRCKLADVTPSLNDYAHMR **Q**HTAGGLA  
TTSWIEIVDGAEIPAAELDSPAVRALSELAFTIAAWD **DDLFSYGKE**TWFARRETPSNCKLNL  
IDIVALERGY SVEAALVESVELVNRLTHRFIQLRDAVLP SASEELRNYLECLSRLLRGNMEW  
GLQA **QRY**RNPDGRSPDAVRTVGSWTEEP PAHADVVPAIPSI AWWWDP ELGL

**Figure S42.** Amino acid sequence of KkAS (WP\_184867163). Highly conserved residues are highlighted in yellow. Sequence deviations within the conserved motifs are highlighted in green.

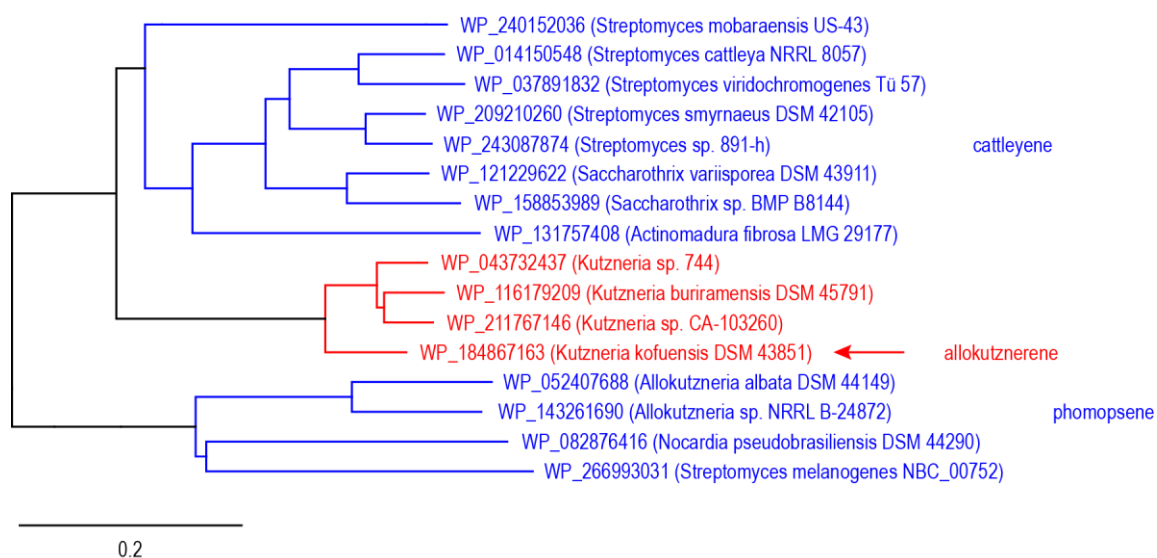

**Figure S43.** Detailed section of the phylogenetic tree shown in Figure 2 of main text. The red arrow highlights the newly characterised allokutznerene synthase from *K. kofuensis* (KkAS).

MNLADLPEGFWTFYCPLDEETGADAERLSANSAAWAQKFDLGLGDANLASLYGAGGASLITH  
AFPHATTDPDLAALADYSAWAFMTDDFIVPDPNARADILHTVYRWAHTMQVPRSWESQGTH  
LDDALRNVLERLRACMSDVQYERFTTAQAGWLHAMLWERALRERGTALTVNDYLAVRIGAVG  
VHATLGYLDAVEGTEITAQEWSSPPVKAAVEASLFAAALDNDRYSFCKESDLAQVNYNLFGA  
LQHEHPDWTLAQAMIEGIAIRDTMLALYLRLREQILPTASPDLRKYLTGVERVVSGDITFGT  
TCMRIFYAPEAAPHIQRTFTPPAHLSDLEPLPYPTIAWWWEHITP

**Figure S44.** Amino acid sequence of sesterviolene synthase from *Streptomyces* sp. Tü 2975 (WP\_159685978). Highly conserved residues are highlighted in yellow. Sequence deviations within the conserved motifs are highlighted in green.



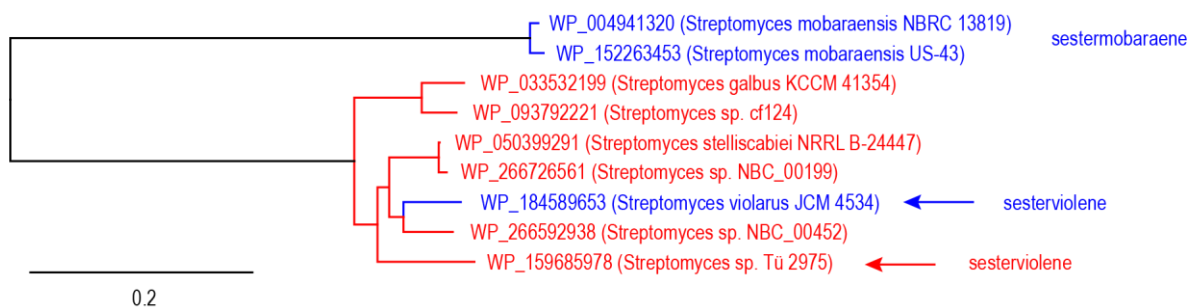

**Figure S45.** Detailed section of the phylogenetic tree shown in Figure 2 of main text. The red arrow highlights the newly characterised sesteriolene synthase from *Streptomyces* sp. Tü 2975 (StSS) and the blue arrow indicates the known enzyme SvSS from *Streptomyces violarius* with same function.

## References

- [1] Neumann, B.; Pospiech, A.; Schairer, H. U. *Trends Genet.*, **1992**, *8*, 332–333.
- [2] Dickschat, J. S.; Pahirulzaman, K. A. K.; Rabe, P.; Klapschinski T. A. *ChemBioChem*, **2014**, *15*, 810–814.
- [3] Giets, R. D.; Schiestl, R. H. *Nat. Protoc.*, **2007**, *2*, 31–34.
- [4] Bradford, M. M. *Anal. Biochem.*, **1976**, *72*, 248–254.
- [5] Fulmer, G. R.; Miller, A. J. M.; Sherden, N. H.; Gottlieb, H. E.; Nudelman A.; Stoltz, B. M.; Bercaw, J. E.; Goldberg, K. I. *Organometallics*, **2010**, *29*, 2176–2179.
- [6] Adams, R. P., *Identification of Essential Oil Compounds by Gas Chromatography / Mass Spectrometry*, Allured Business Media, Carol Stream, USA, **2009**.
- [7] Adams, R. P. *Biochem. Syst. Ecol.*, **1999**, *27*, 709–725.
